# Supplementary material for: Adipocyte-secreted BMP8b mediates adrenergic-induced remodeling of the neuro-vascular network in adipose tissue
Source: PubMed Central journal article supplement (PMC6255810; doi:10.1038/s41467-018-07453-x), 2018-11-26
Supplement: 41467_2018_7453_MOESM1_ESM.pdf [file 41467_2018_7453_MOESM1_ESM.pdf]

## Supplementary Information

### **Adipocyte-secreted BMP8b mediates adrenergic-induced remodeling of the neuro-vascular network in adipose tissue**

*V Pellegrinelli & VJ Peirce et.al*

Correspondence: vp332@medschl.cam.ac.uk (V.P); ajv22@medschl.cam.ac.uk (A.V.-P.).

Supplementary Information includes 12 Figures and 2 tables

# SUPPLEMENTARY FIGURES

## Supplementary Figure 1:

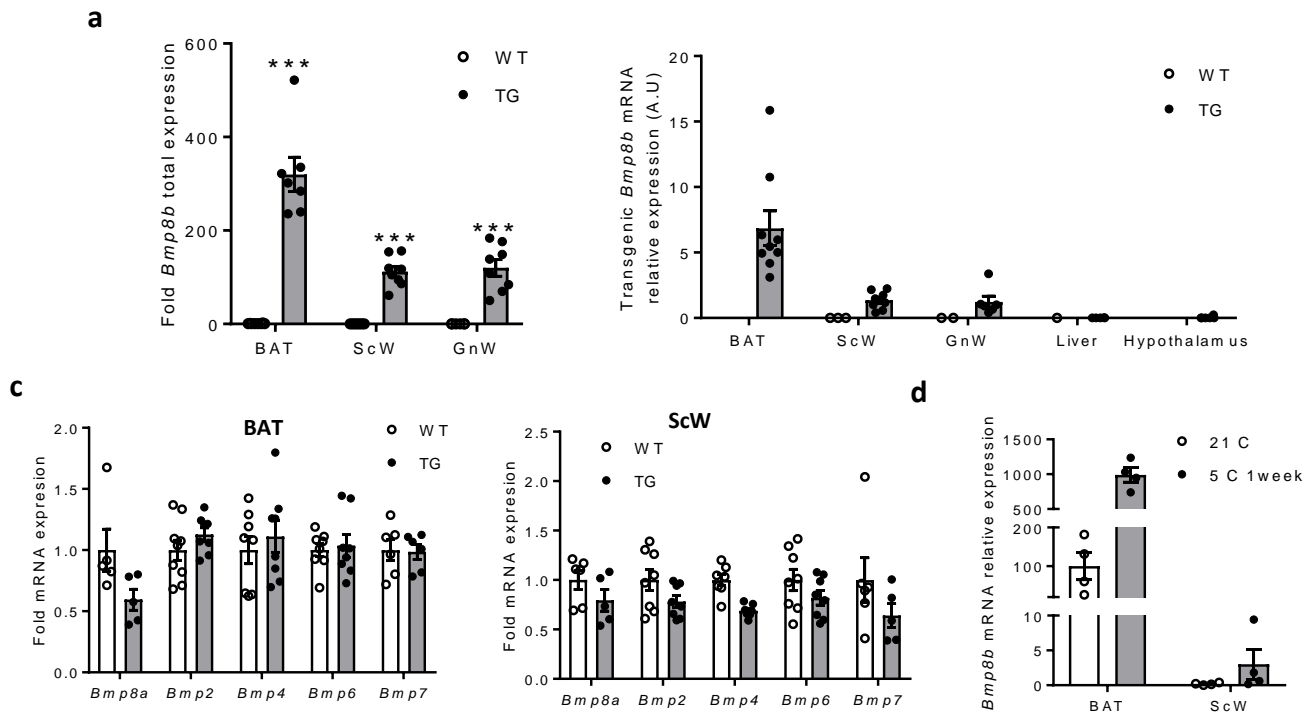

### Supplementary Figure 1: BMP8b expression profile in TG and cold exposed mice

a, b: Total (a) and transgenic (b) *Bmp8b* mRNA levels in tissues from 5-week-old *Bmp8b* WT and TG mice, n = 5-9. \* p < 0.05 compared to WT using student's t-test. n.d. non determined.

c: mRNA levels of *Bmp8b*, *Bmp2*, *Bmp4*, *Bmp6*, and *Bmp7* in interscapular BAT (b) and ScW (c) from 5-week-old WT and *Bmp8b* TG mice n=5-9. Data is represented normalized to the WT value. \* p < 0.05 compared to WT using student's t-test, ns = not significant.

d: *Bmp8b* mRNA levels in interscapular BAT and inguinal ScW from 18-week-old WT male mice acclimated to 21°C and then exposed to 5 °C for 1 week, n = 4. Data is represented normalized to the BAT 21°C acclimated value (100). \* p < 0.05 compared to 21 °C acclimated using Student's t-test.

\* < 0.05, compared to wt using two way anova with sidak's post-hoc multiple comparisons test (a, d). \*p < 0.05, compared to wt using multiple t-test with fdr determined using the two-stage linear step-up procedure of Benjamini, Krieger and Yekutieli (c).

# Supplementary Figure 2:

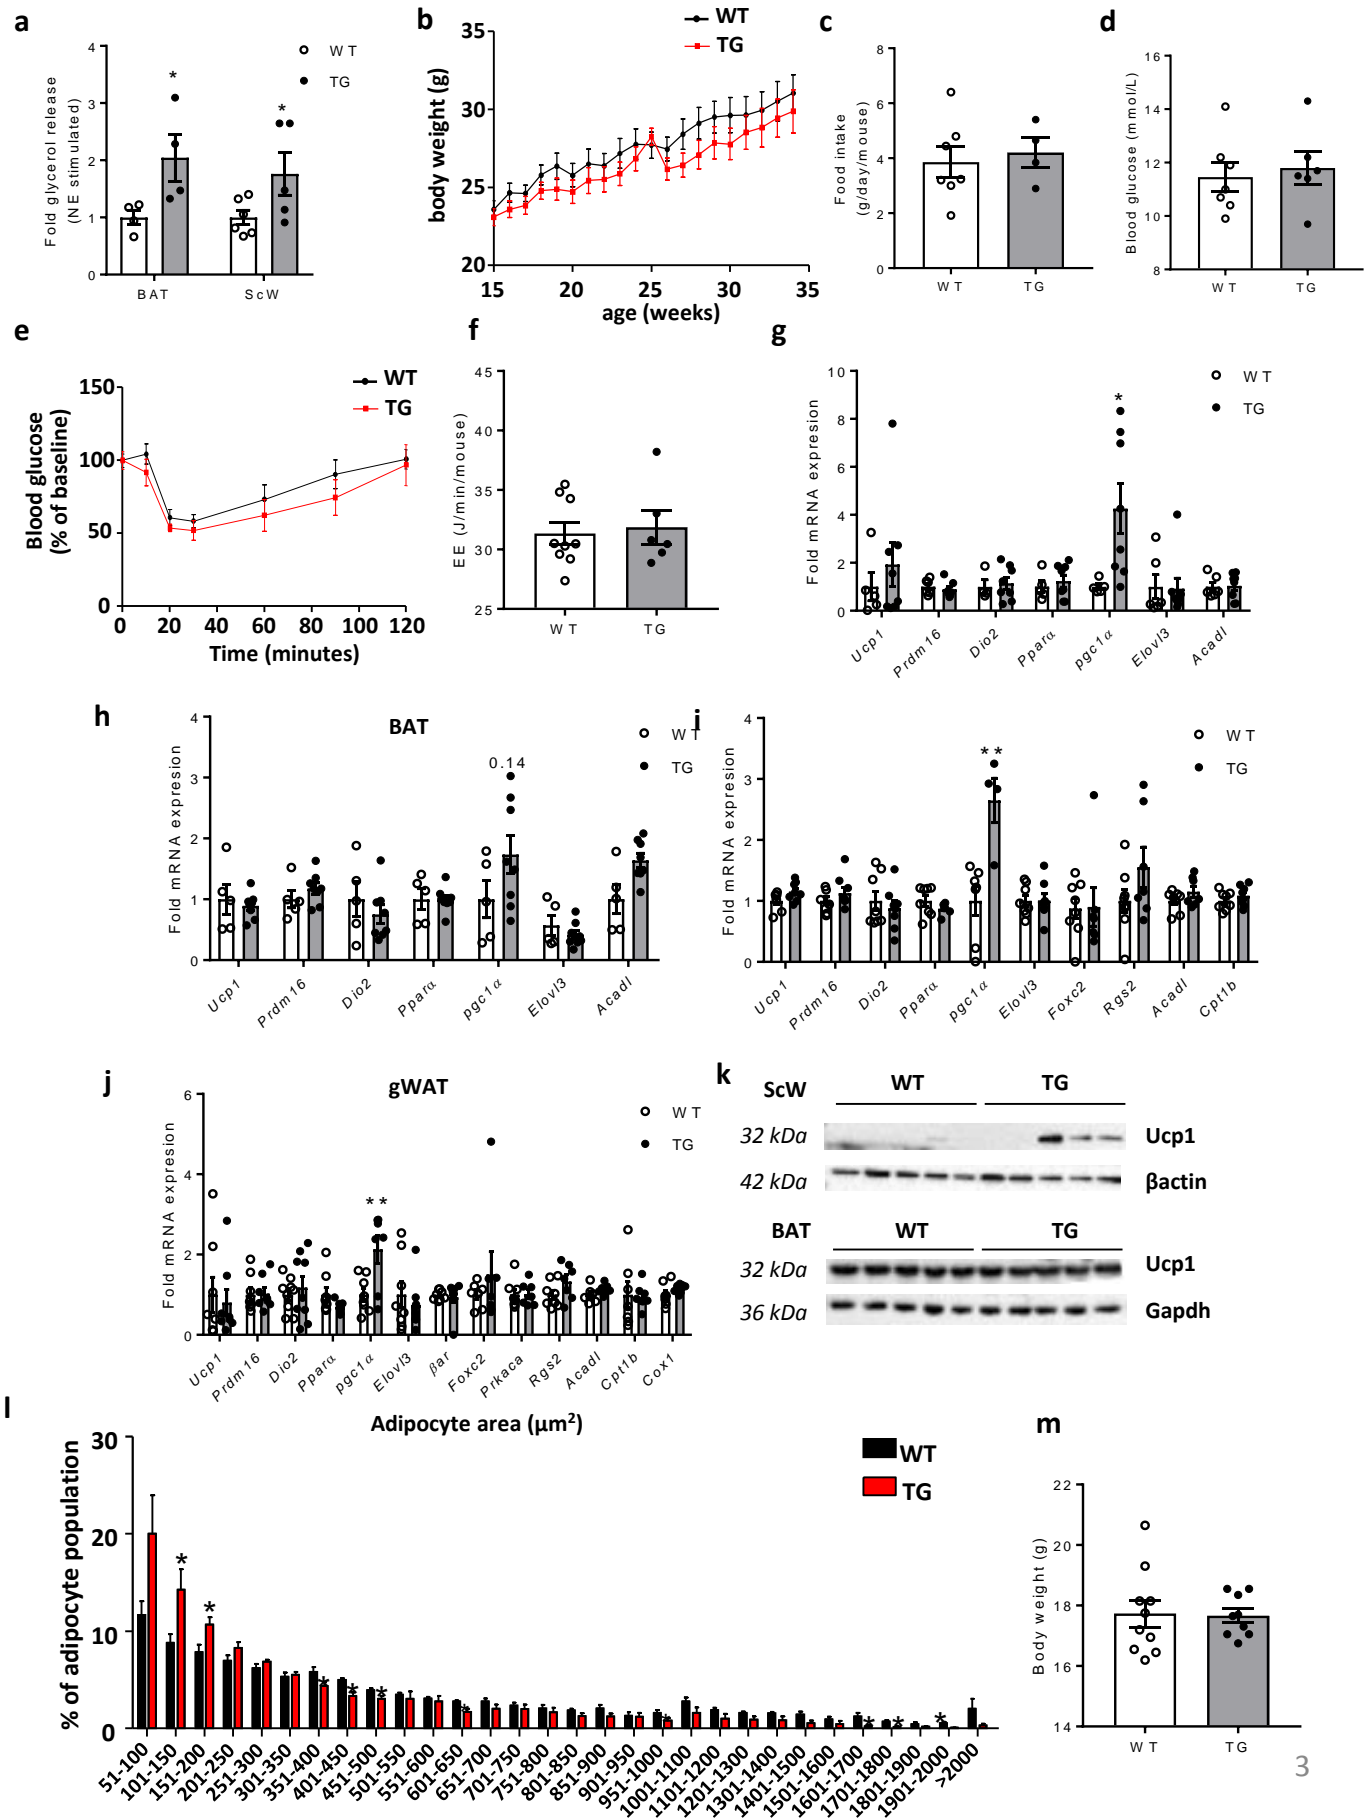

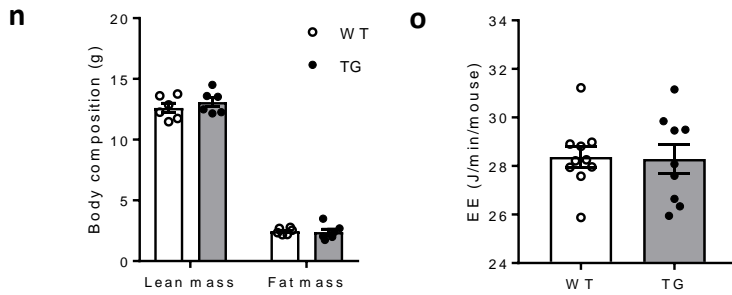

**Supplementary Figure 2: BMP8b overexpression on metabolism and BAT/ScW expression profile**

a: NE (100nM) stimulated lipolysis in mature brown or white adipocytes isolated from BAT and ScW of 10 weeks-old female wild type (WT) and *Bmp8b* TG (TG) mice housed at 21°C. Results are expressed in fold glycerol release over WT. n=4-6

b, c: Body weights (b) and food consumption (c) from 15-35 weeks old *Bmp8b* TG and WT mice (chow fed, housed at 21°C, n = 4-8).

d, e: Fasting blood glucose levels (d) and blood glucose levels represented as percentage of baseline up to 120 minutes after an intraperitoneal injection of a fixed dose of insulin (0.75 IU/kg; B) in an insulin tolerance test (ITT) (e) in 6-month-old WT and *Bmp8b* TG female mice fed a 45% HFD for 4 months, n = 6-7.

f: Energy expenditure (EE) of 6-month-old WT and *Bmp8b* TG mice (n =6-9) fed a 45% HFD for 4 months

g-i: Relative mRNA levels of thermogenic genes in ScW(g) and interscapular BAT (h, i) from 8-month-old (g, h) and 5-weeks-old (i) *bmp8b* WT and TG mice, n = 5-8. Data is represented normalized to the WT value.

j: Relative mRNA levels of thermogenic genes in GnW from 5-weeks-old *Bmpb* WT and TG female, n = 7-9. Data is represented normalized to the WT value.

k: UCP1 protein levels in BAT and ScW from 5-week-old *Bmp8b* TG and WT mice. n = 5

l: Quantification of the adipocyte area in inguinal ScW from 5-week-old WT and *Bmp8b* TG female mice. n = 5.

m-o: Body weight (m) body composition (n) and EE (o) from 5-week-old *Bmp8b* TG and WT mice of 5-week-old WT and BMP8bTG (TG) mice, n=6-10.

\* p < 0.05 compared to WT using student's t-test (a, l). \*p<0.05, compared to WT using multiple t-test with FDR determined using the two-stage linear step-up procedure of Benjamini, Krieger and Yekutieli (g, j).

### Supplementary Figure 3:

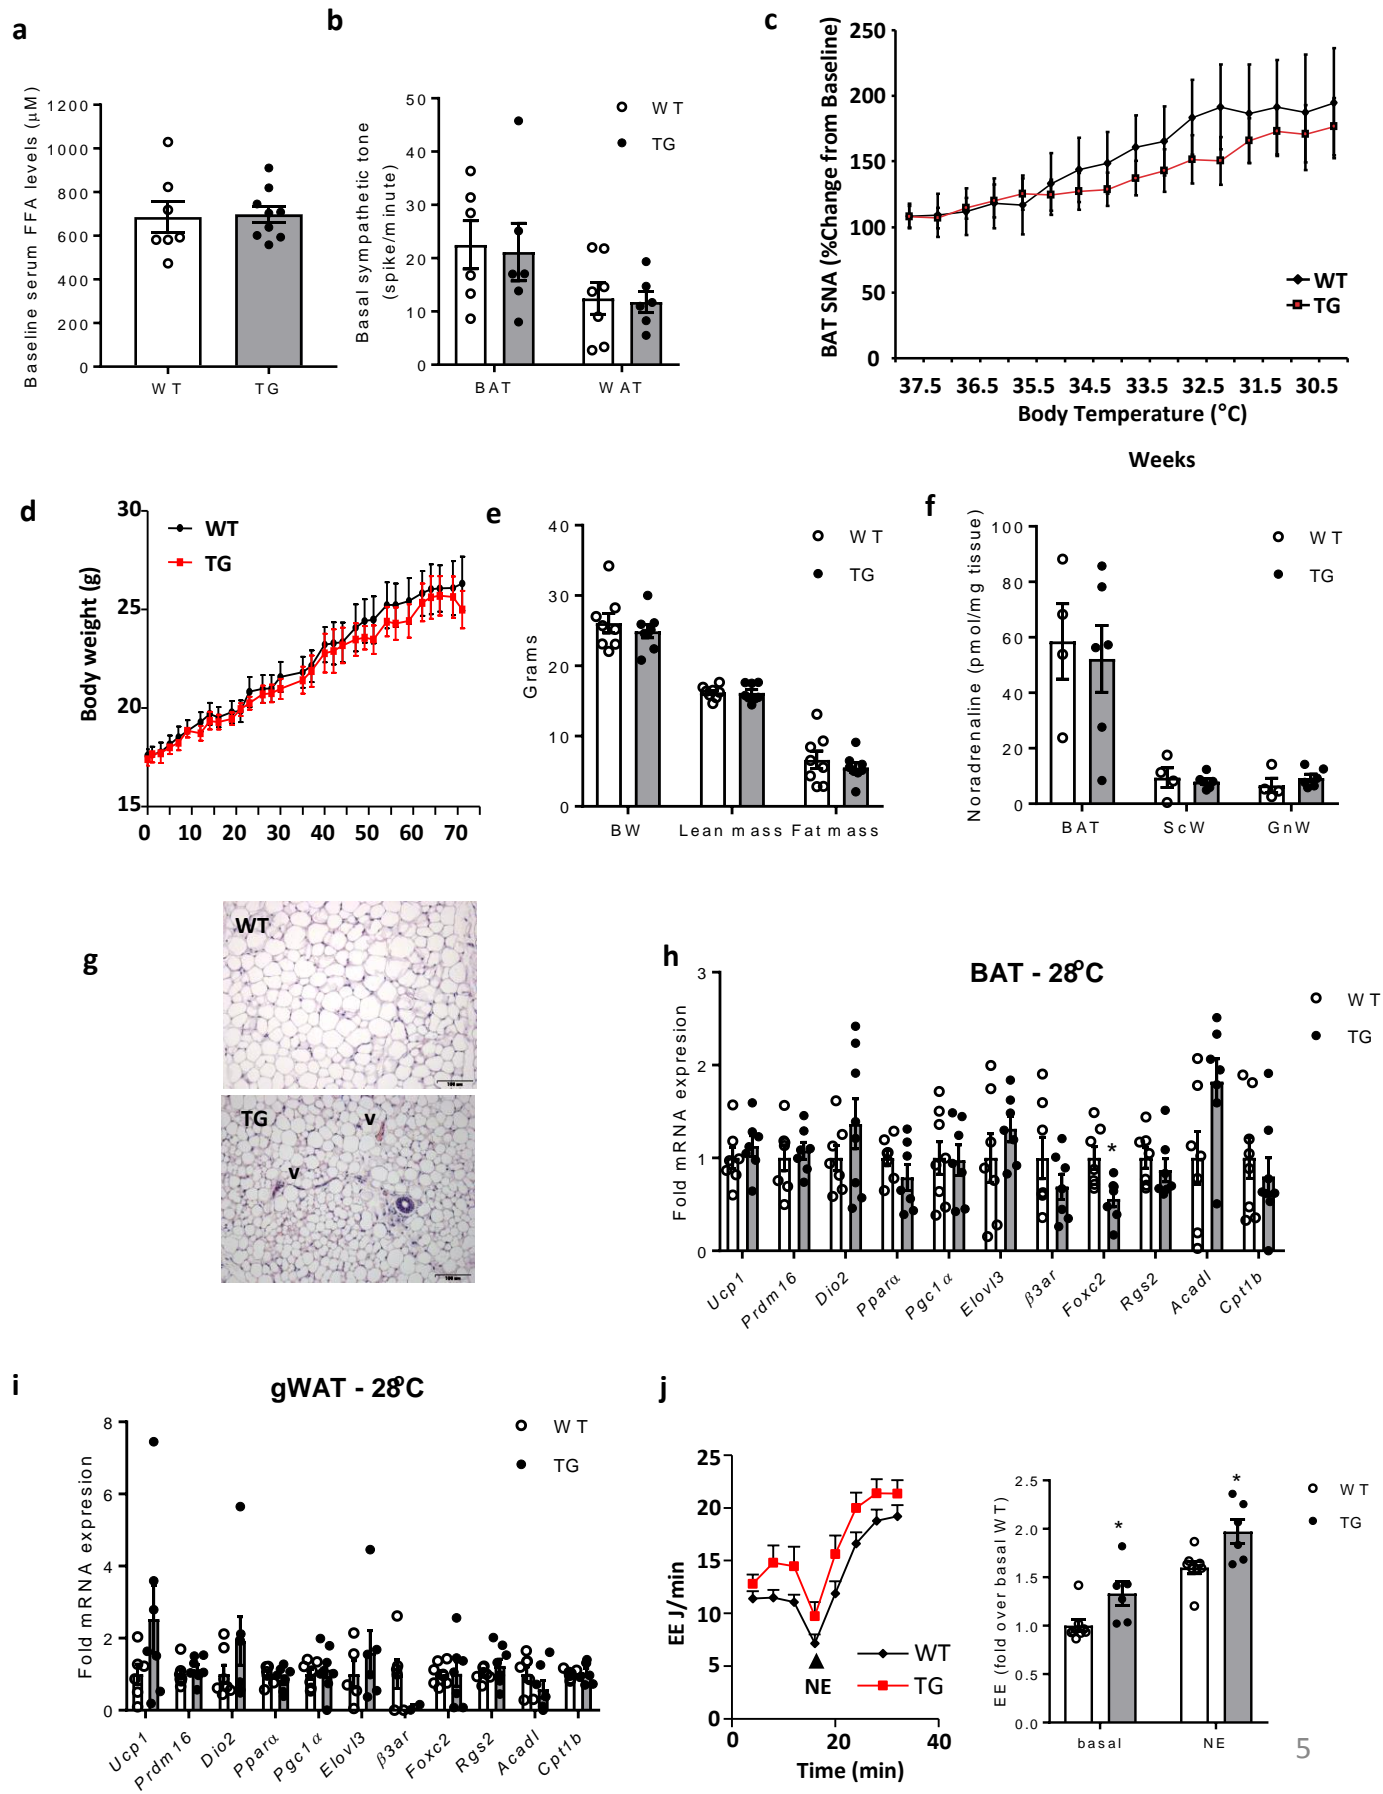

### Supplementary Figure 3: Effect of thermoneutrality in BMP8b TG mice

a: Baseline FFA levels in the serum of 12 weeks-old *bmp8b* WT and TG mice. n=7-9.

b, c: Direct measurement of SNA to BAT and WAT of 12 weeks old *bmp8b* WT and TG mice in baseline (b) and in response to controlled lowering of body temperature for 30 min (c). n =6-7

d, e: Body weights (d) and body composition (e) from *Bmp8b* TG and WT female mice over the course of 10 weeks of HFD-feeding at 28 °C. n = 8

f: Noradrenaline measurement in adipose tissue from 5weeks-old *bmp8b* WT and TG animals born and housed at 28C. n= 4-6.

g: Representative images of haematoxylin and eosin (H&E) staining in inguinal ScW from 5-week-old WT and TG female mice born and housed at 28 °C. n = 5.v, vessels.

h,i: Fold variation of mRNA levels of molecules that regulate thermogenesis in BAT (h) and GnW (i) from 5-week-old *Bmp8b* WT and TG mice born and housed at 28°C. n = 7-8. \*  $p < 0.05$  compared to WT using Mann Whitney test

j: NE stimulated Energy Expenditure (EE) in 12 weeks old WT and *Bmp8b* TG (TG) mice born and housed at 28°C, expressed as EE over time (genotype effect  $p < 0.0001$ ) and fold increase over basal condition, n = 6-8 \* $< 0.05$  one-way ANOVA with Bonferroni post-hoc test

\* $p < 0.05$ , compared to WT using multiple t-test with FDR determined using the two-stage linear step-up procedure of Benjamini, Krieger and Yekutieli (h). \* $< 0.05$  compared to WT using repeated measures ANOVA with Sidak's post-hoc multiple comparisons test (j).

# Supplementary Figure 4

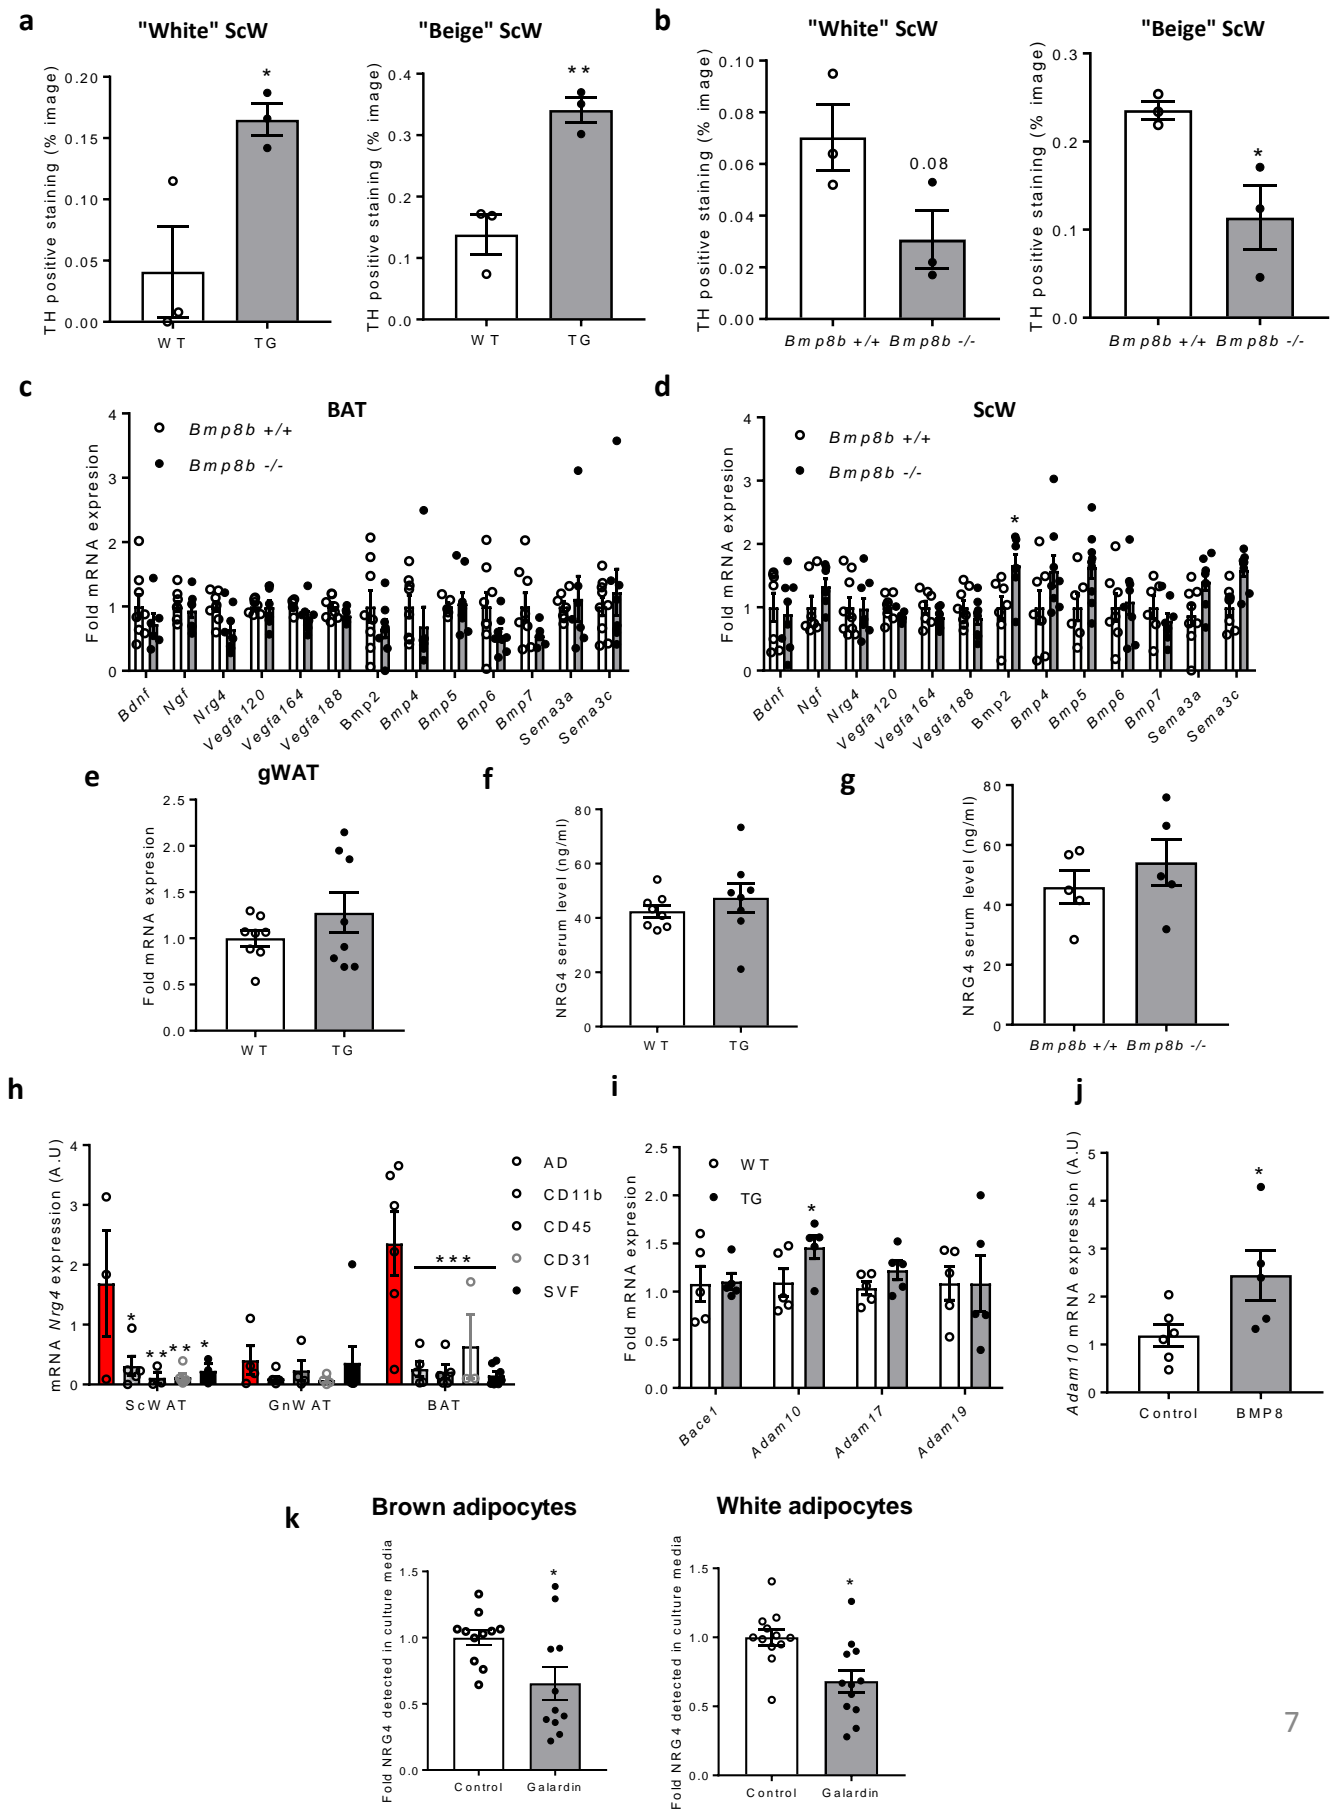

#### Supplementary Figure 4: BAT and ScW innervation in *Bmp8b* TG and *-/-* mice

a, b: Quantification of TH-positive staining in areas of purely beige adipocytes and areas of purely white adipocytes in ScW from 5-week-old female WT/*Bmp8b* TG (a) and *Bmp8b*<sup>+/+</sup>/*Bmp8b*<sup>-/-</sup> (b) mice, n = 3.

c, d: Fold variation of mRNA levels of molecules that regulate sympathetic neuron survival, axonal or dendritic guidance or growth in BAT (c) and ScW (d) from 5-week-old WT and KO mice. n = 6-9.

e: Fold variation of *Nrg4* mRNA levels in GnW from 5-week-old WT mice. n = 8.

f, g: ELISA analysis of NRG4 levels in serum from WT vs *Bmp8b* TG (f), and *Bmp8b*<sup>+/+</sup>/*Bmp8b*<sup>-/-</sup> (g), n=5-8.

h: Cell distribution of NRG4 expression in inguinal ScW, gonadal GnW and interscapular BAT from 10 weeks old WT mice (n=3-7). AD, adipocytes, CD11b, macrophages, CD45, immune cells and progenitors, CD31, endothelial cells and SVF<sup>-</sup>, negative stroma-vascular fraction.

i, j: Expression of MMPs in primary brown adipocytes from *Bmp8b* WT and TG mice (i) and differentiated CS57 brown adipocytes treated during differentiation (9 days) with recombinant BMP8 (100pM) (j). n= 5-6. Data is represented normalized to the WT value.

k: Nrg4 secretion into the media by primary brown and white adipocytes treated with the broad-spectrum protease inhibitor galardin (10 μM for 24 hours). n= 12. Data is represented normalized to the WT value.

\* p< 0.05 compared to WT using student's t-test (a, b, j, k). \*p<0.05, compared to WT using multiple t-test with FDR determined using the two-stage linear step-up procedure of Benjamini, Krieger and Yekutieli (c, d, i). \*p<0.05 compared to adipocytes (AD) using One-way ANOVA with Sidak's post-hoc multiple comparisons test (h).



## Supplementary Figure 5:

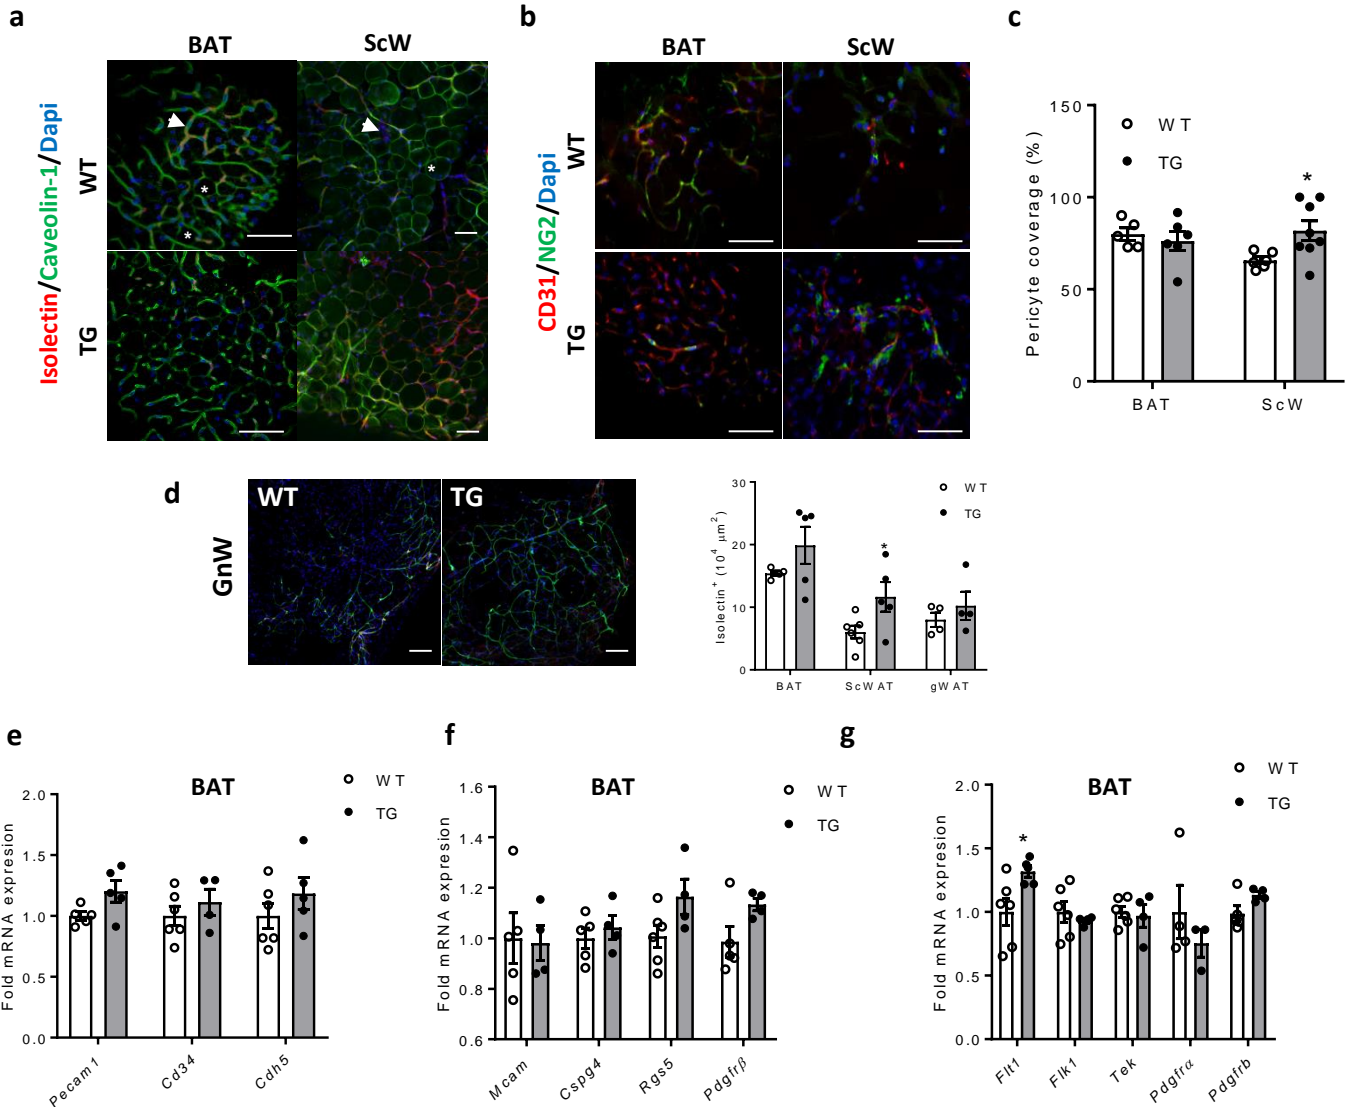

### Supplementary Figure 5: Pericyte coverage in BAT/ScW and angiogenic profile in BAT from *Bmp8b* TG mice.

a: Representative images of confocal analysis of Isolectin IB4 and anti-caveolin-1 staining in BAT and ScW from 5-week-old WT and *Bmp8b* TG mice ; adipocytes are indicated with a white star and capillaries are tubular structures indicated by white arrows). Scale bar, 100μm.

b, c: Representative images of confocal analysis of CD31 (red, endothelial cells) and NG2 (green, pericytes) immunostainings in interscapular BAT and inguinal ScW from 5-week-old WT and *Bmp8b* TG (TG) mice (b) and quantification of pericytes coverage as percentage of pericytes in contact with endothelial cells (c). n=5-8.

d: Representative images of confocal analysis of Isolectin IB4 staining in GnW from 5-week-old WT and *Bmp8b* TG mice, and quantification of isolectin positive areas. n=4-6. Scale bar, 100μm.

e-g: Fold variation of mRNA levels endothelial cell (e), pericytes markers (f) and receptor of angiogenic factors (g) in BAT from 4-week TG female mice, n = 5-6. Data are expressed in fold variation over control WT littermate.

\*p<0.05 compared to WT using Two-way ANOVA with Sidak's post-hoc multiple comparisons test (c). \* p<0.05 compared to WT using student's t-test (d). \*p<0.05, compared to WT using multiple t-test with FDR determined using the two-stage linear step-up procedure of Benjamini, Krieger and Yekutieli (g)

## Supplementary Figure 6:

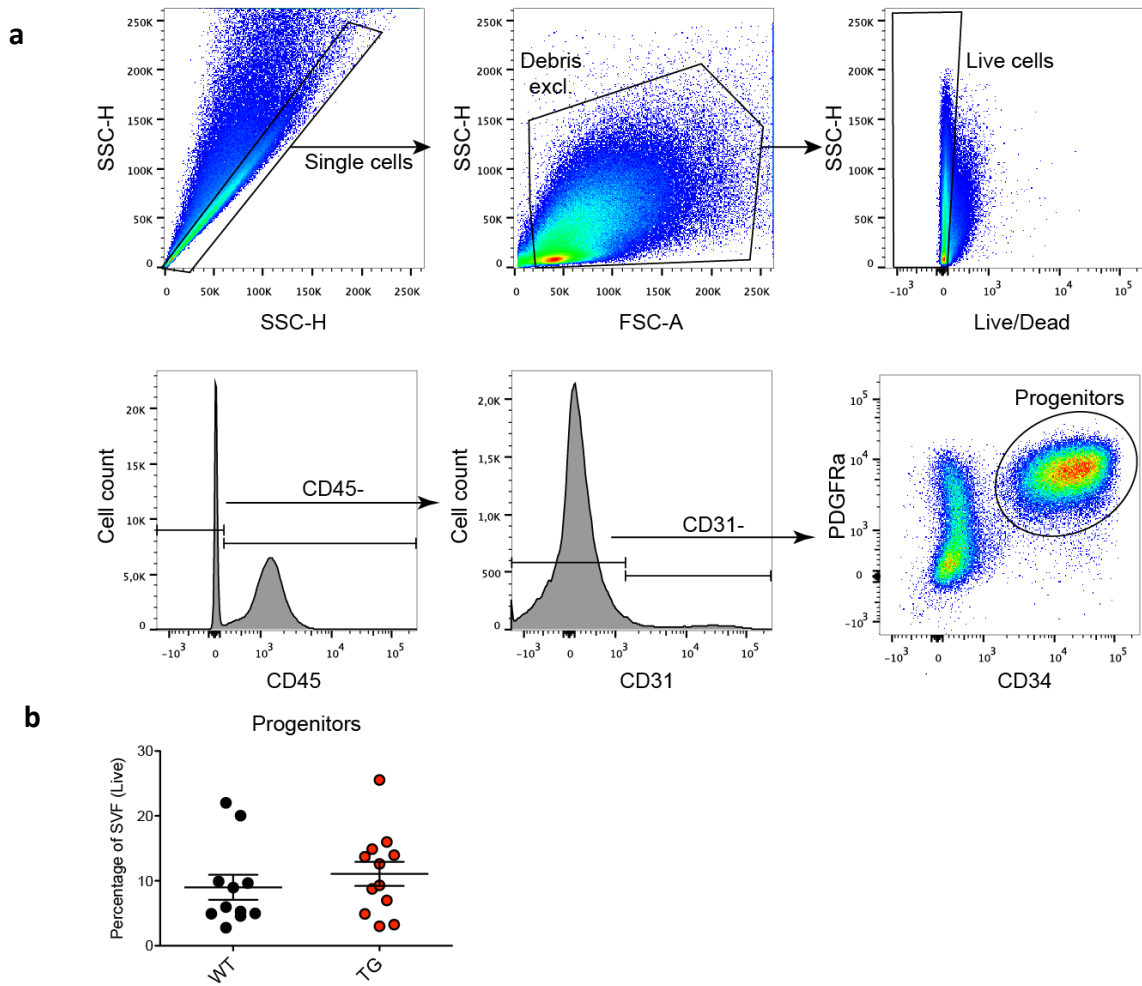

**Supplementary Figure 6:** Gating strategy for flow cytometry analysis of ScW progenitors.

a: SVF cells isolated from inguinal ScW of 12 weeks-month-old *Bmp8b* TG and WT mice were sequentially gated to discard doublets and clumps, debris and dead cells. The progenitors population (CD34<sup>+</sup> PDGFR $\alpha$ <sup>+</sup>) was gated on CD45<sup>-</sup> and CD31<sup>-</sup> cell populations.

b: Quantification of the number of progenitors expressed as percentage of the SVF population.

## Supplementary Figure 7:

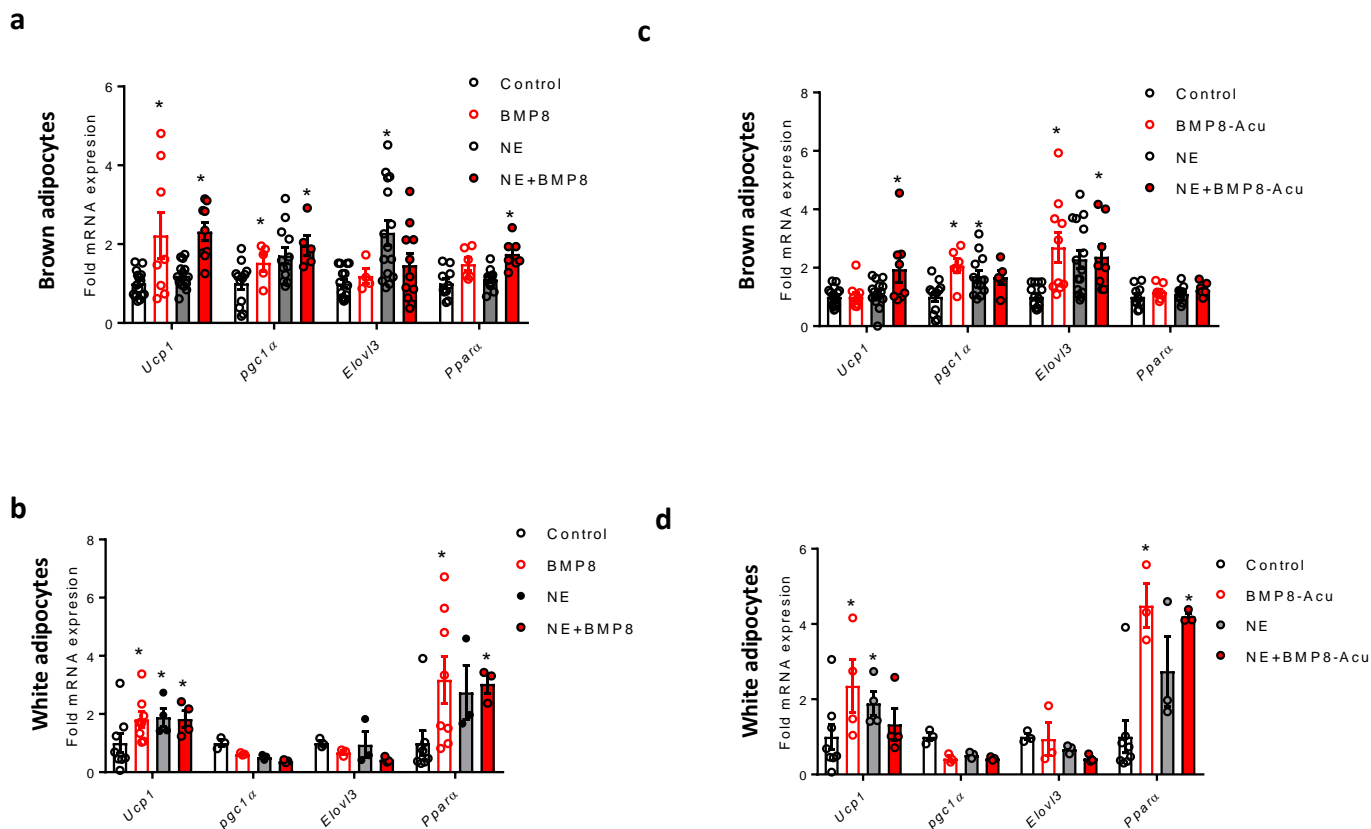

### Supplementary Figure 7: Effect of BMP8 recombinant protein on thermogenic genes

a, b: Fold variation of relative mRNA levels of thermogenic genes in brown C57 adipocytes (a) and white 3T3L1 (b) differentiated adipocytes in control conditions or stimulated during the time of differentiation (9days) with recombinant human BMP8 protein (100pM, BMP8) and/or NE (75nM, BMP8 + NE and NE, respectively). n = 6-16.

c, d: Fold variation of relative mRNA levels of thermogenic genes in brown C57 adipocytes (c) and white 3T3L1 (d) differentiated adipocytes in control conditions or stimulated acutely (Acu) 24h with recombinant human BMP8 protein (BMP8-Acu) and/or NE (NE+BMP8b-Acu and NE, respectively). n = 3-8

\*p<0.05 compared to control using One-way ANOVA with Sidak's post-hoc multiple comparisons test

# Supplementary Figure 8:

**a**

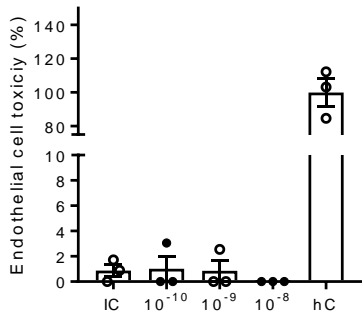

**b**

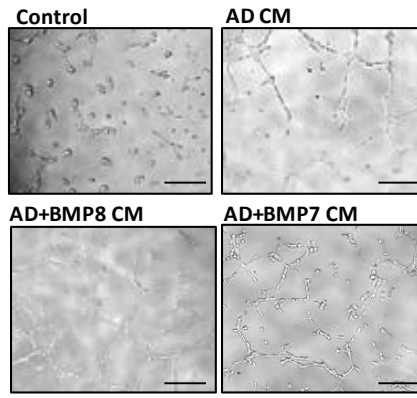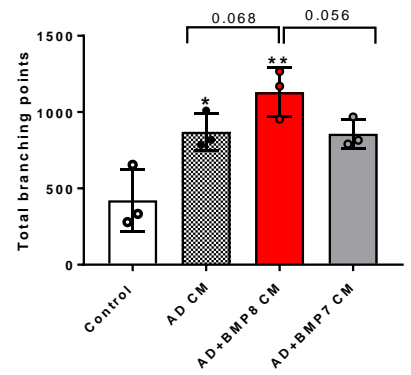

**c**

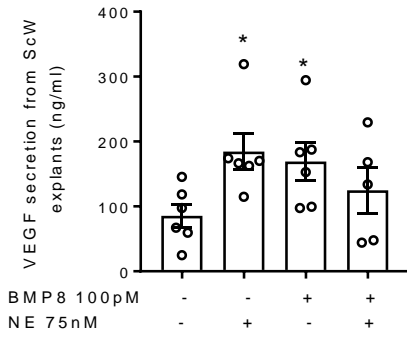

**d**

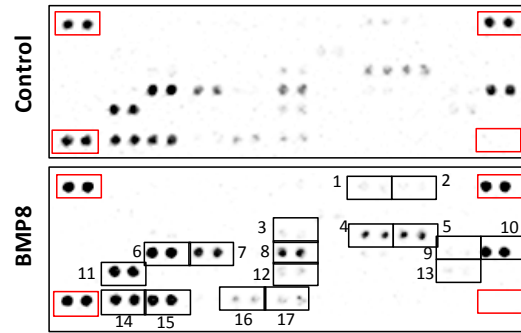

**e**

Brown adipocyte secretion (fold change over control)

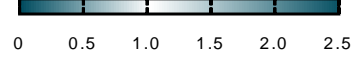

|            | Control | Bmp8b |
|------------|---------|-------|
| CXCL12     |         |       |
| PAI1       |         |       |
| PEDF       |         |       |
| TSP2       |         |       |
| TIMP1      |         |       |
| TIMP4      |         |       |
| VEGF       |         |       |
| VEGFB      |         |       |
| OPN        |         |       |
| PD-ECGF    |         |       |
| PDGF-AA    |         |       |
| PDGF-AB/BB |         |       |
| PTX3       |         |       |
| CXCL4      |         |       |
| PIGF2      |         |       |
| PRL        |         |       |
| Proliferin |         |       |
| IL10       |         |       |
| IP10       |         |       |
| CXCL1      |         |       |
| Leptin     |         |       |
| CCL2       |         |       |
| CCL3       |         |       |
| MMP3       |         |       |
| MMP8       |         |       |
| MMP9       |         |       |
| CCN3       |         |       |
| FGF7       |         |       |
| CX3CL1     |         |       |
| GMCSF      |         |       |
| HB-EGF     |         |       |
| HGF        |         |       |
| IGFBP1     |         |       |
| IGFBP2     |         |       |
| IGFBP3     |         |       |
| IL1a       |         |       |
| IL1b       |         |       |
| CCN1       |         |       |
| DLL4       |         |       |
| DPP4       |         |       |
| EGF        |         |       |
| Endoglin   |         |       |
| Endostatin |         |       |
| ET1        |         |       |
| FGF1       |         |       |
| FGF2       |         |       |
| ADAMTS1    |         |       |
| AR         |         |       |
| ANG        |         |       |
| Ang1       |         |       |
| Ang3       |         |       |
| TF         |         |       |
| CXCL16     |         |       |

**f**

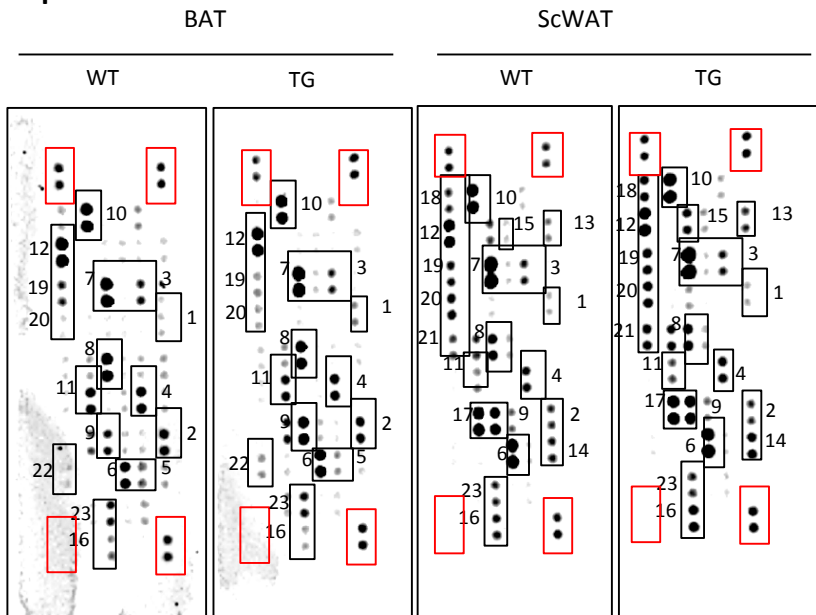

### Supplementary Figure 8: Pro-angiogenic role of BMP8b

a: Effects of recombinant BMP8 on mouse cardiac endothelial cell (MCEC) toxicity (data representative of one experiment performed in triplicate). One-way ANOVA with Bonferroni post-hoc test comparing all data columns ( $p < 0.05$ ).  $n=3$ .

b: Representative images and quantification of mouse cardiac endothelial cell (MCEC) vascular tube formation on Matrigel, without (control) or with conditioned medium (CM) prepared from brown adipocyte pre-treated without (AD CM) or with recombinant BMP8 (AD + BMP8 CM) or BMP7 (AD+BMP7 CM) (100pM, 24h). ( $n = 3$  experiments in triplicate). Scale bar, 500 $\mu$ m.

c: ELISA analysis of VEGF secretion from ScW explants of 10 weeks old WT cultured in presence of NE or recombinant BMP8b, or both NE + BMP8b during 24h.  $n=6$

d, e: Angiogenesis Array of multiple analytes in culture medium of differentiated C57 brown adipocytes treated without (control) or with recombinant BMP8 (100pM, 30min). Each array was incubated with 1000  $\mu$ L of a pool of 4 independent culture supernatant (d). Results are expressed in fold variation of protein levels of angiogenesis related factors and presented in a heat map with graded shades of magenta (down-regulated) and green (up-regulated) (e).

1:TF, 2:CXCL16, 3:HGF, 4:IGFBP-2, 5:IGFBP-3, 6:IP-10, 7:CXCL1, 8:CCL2, 9:MMP9, 10:CCN3, 11:OPN, 12:PTX3, 13:Proliferin, 14:CXCL2, 15:PAI-1, 16:TSP-2, 17:TIMP-1.

f: Angiogenesis Array of multiple analytes in culture medium of BAT and ScW explants from 12 weeks-old *Bmp8b* TG and WT mice. Each array was incubated with 1000  $\mu$ L of culture supernatant.

1:ANG, 2:TF, 3:DPPIV, 4:Endostatin, 5:FGF-1, 6:IGFBP-3, 7:CXCL1, 8:CCL2, 9:MMP-3, 10:OPN, 11:CXCL4, 12:PAI-1, 13:ADAMTS, 14:CXCL16, 15:IP-10, 16:CCN1, 17:PIGF2, 18:CXCL12, 19:PEDG, 20:TSP-2, 21:TIMP-1, 22:VEGF, 23:MMP9

\* $p < 0.05$  compared to IC (a) or control (b, c) using One-way ANOVA with Sidak's post-hoc multiple comparisons test (a, b, c)

## Supplementary Figure 9:

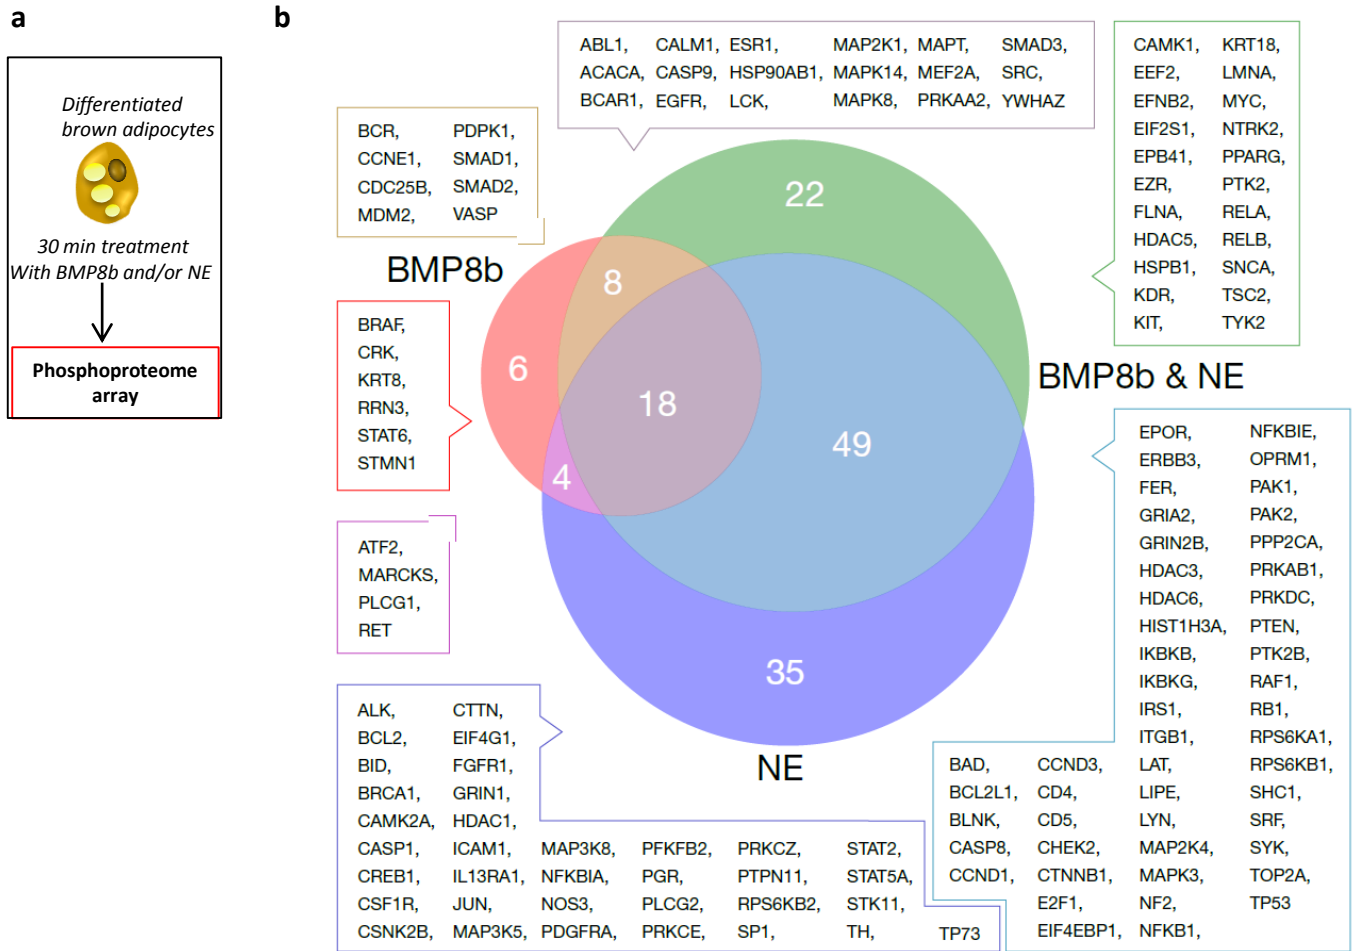

### Supplementary Figure 9: Phosphoproteomic analysis in brown adipocytes treated with BMP8b±NE

a: Schematic of brown adipocyte treatment with or without (control) human recombinant BMP8b (100 pM) and/or NE (75 nM) prior phosphoproteome analysis

b: Venn-diagrams: Proteins with fold change values above 2 (twice more or half less phosphorylated) on any of their phosphosites between treatments. Proteins are represented by standard human gene names. The number of proteins in each field is proportional with the area of the field and shown by numbers.

## Supplementary Figure 10:

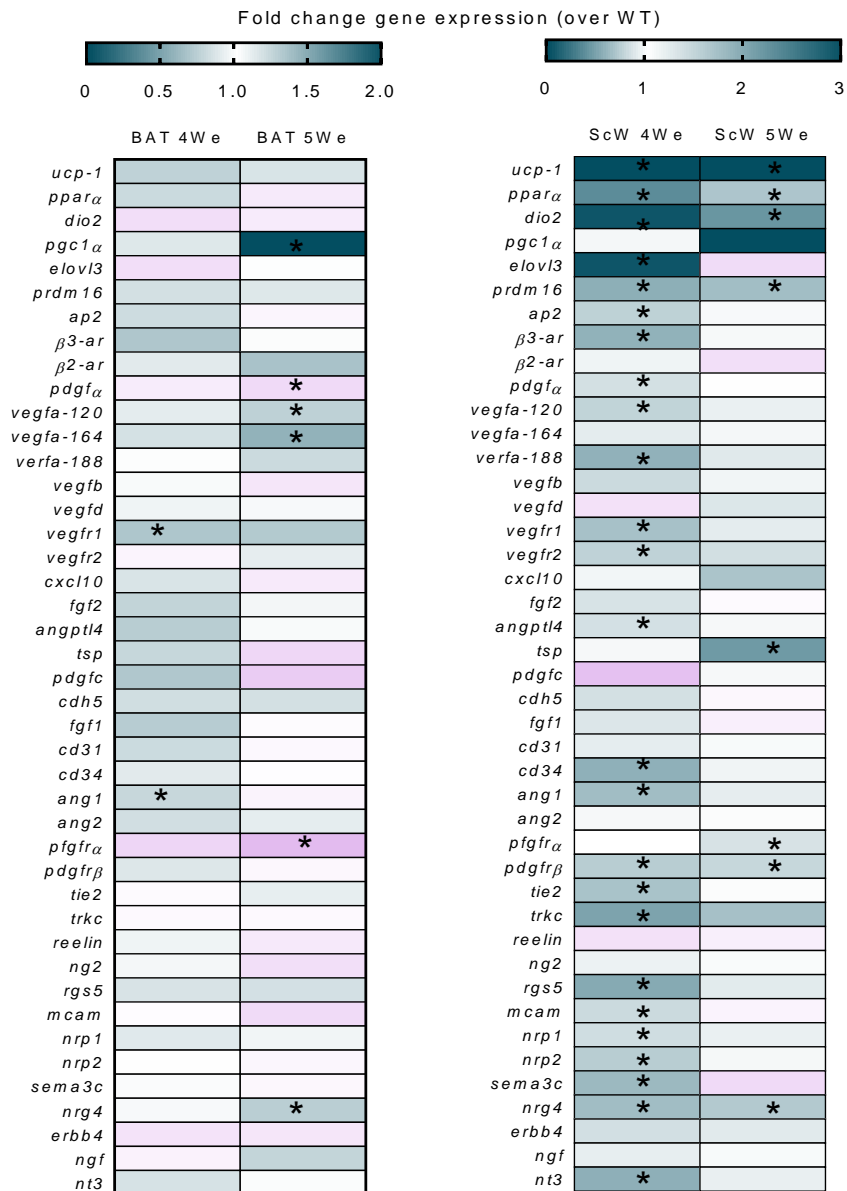

### Supplementary Figure 10: Differential expression in 4 and 5 weeks old *Bmp8b* TG mice.

Fold variation of mRNA levels of molecules that regulate thermogenesis, neurogenesis and angiogenesis in BAT and ScW from 4 and 5-week-old *Bmp8b* WT and TG mice. n = 6-8.

\*p<0.05, compared to WT using multiple t-test with FDR determined using the two-stage linear step-up procedure of Benjamini, Krieger and Yekutieli .

Supplementary Figure 11:

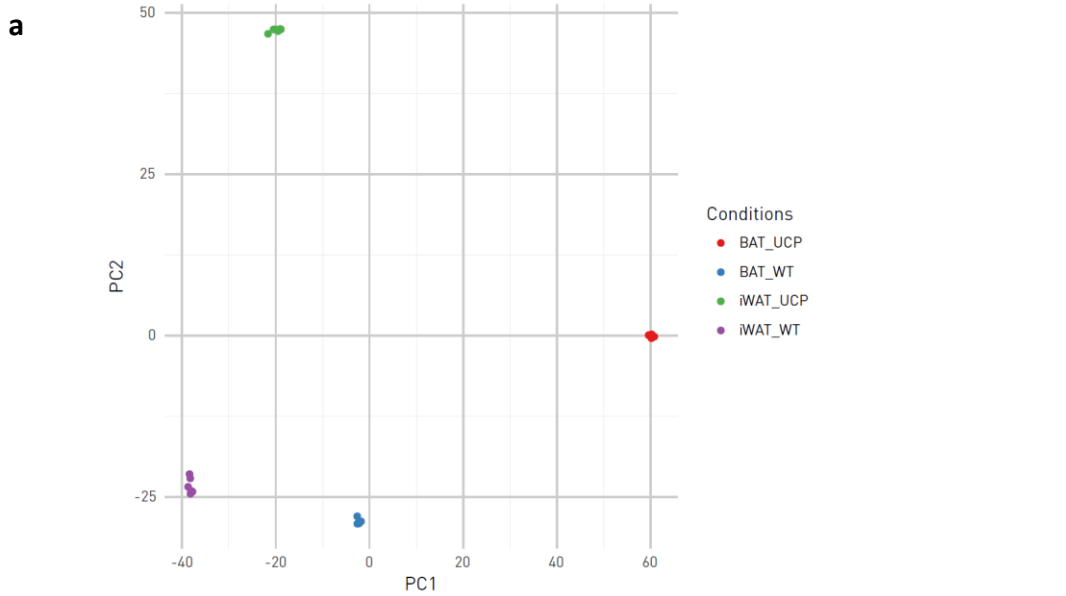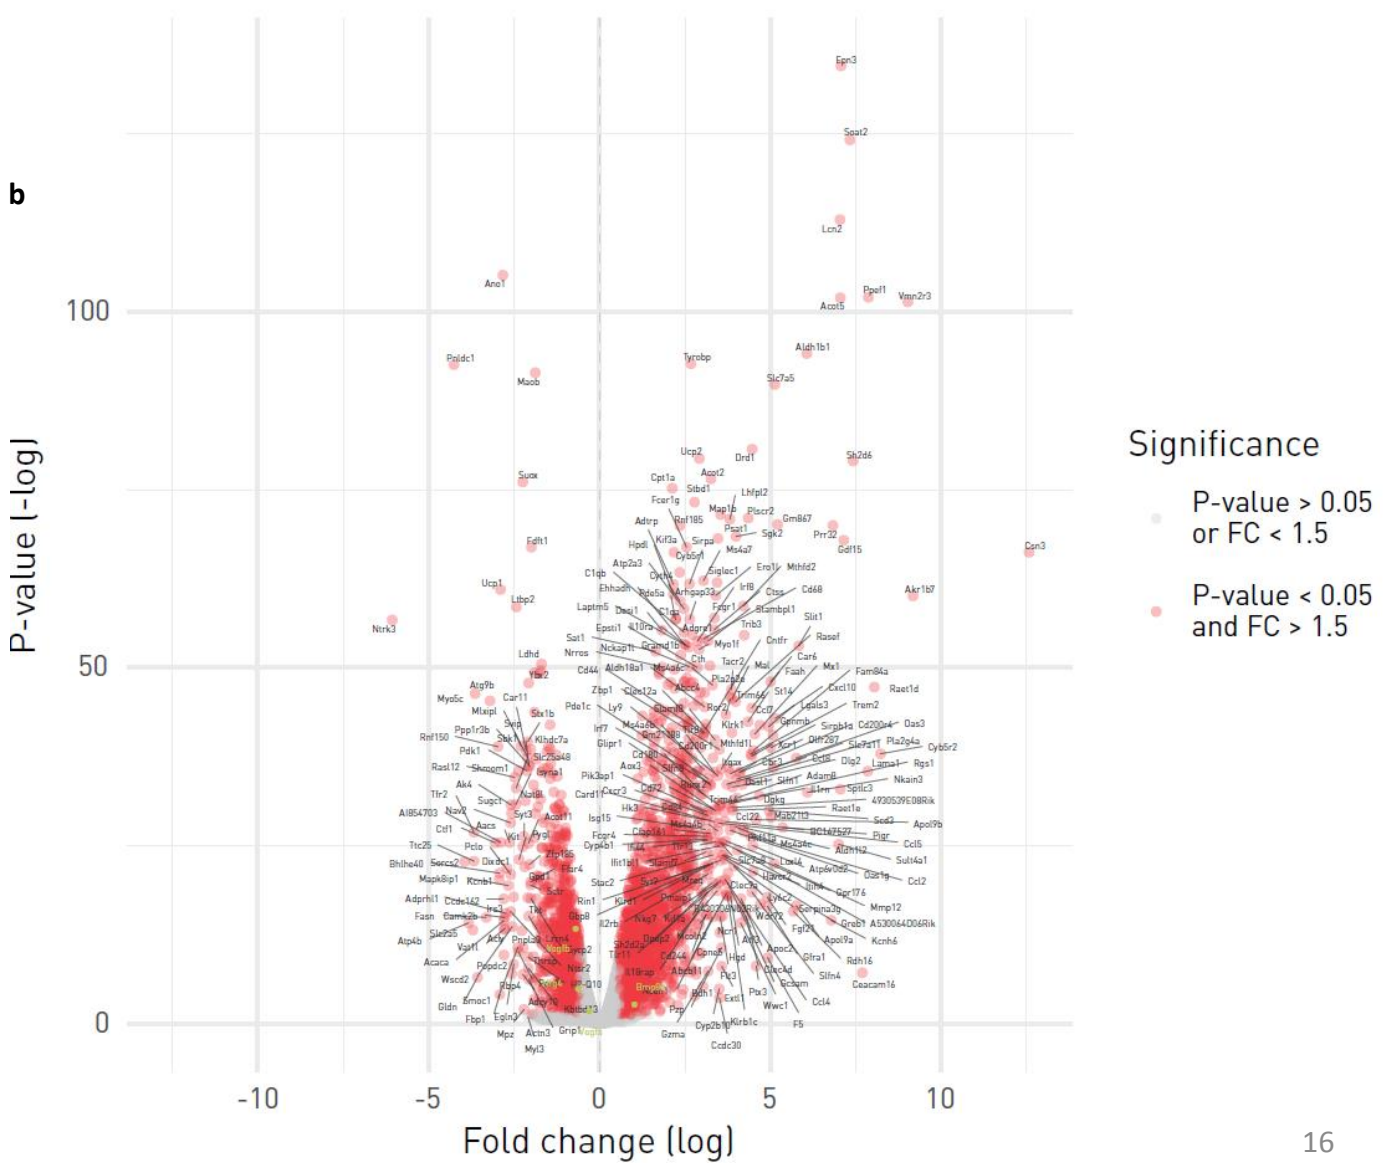





**d**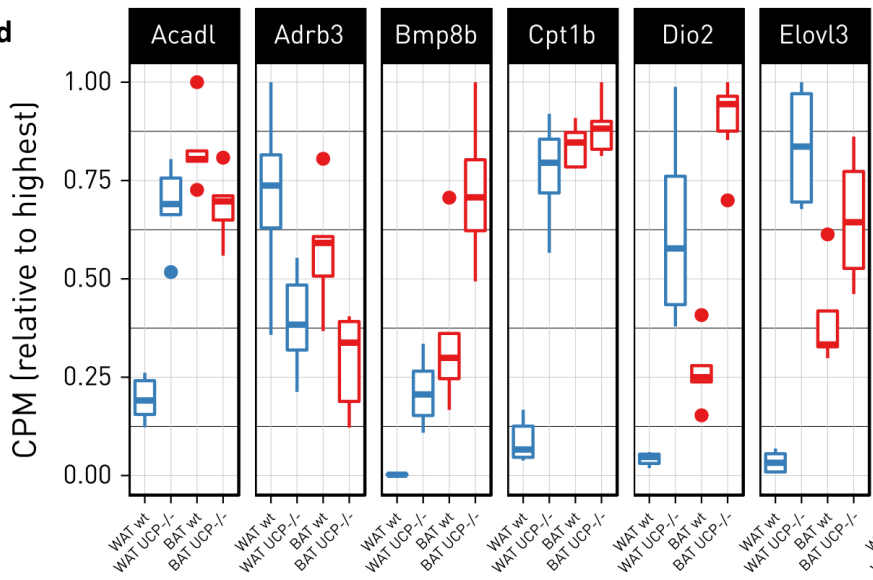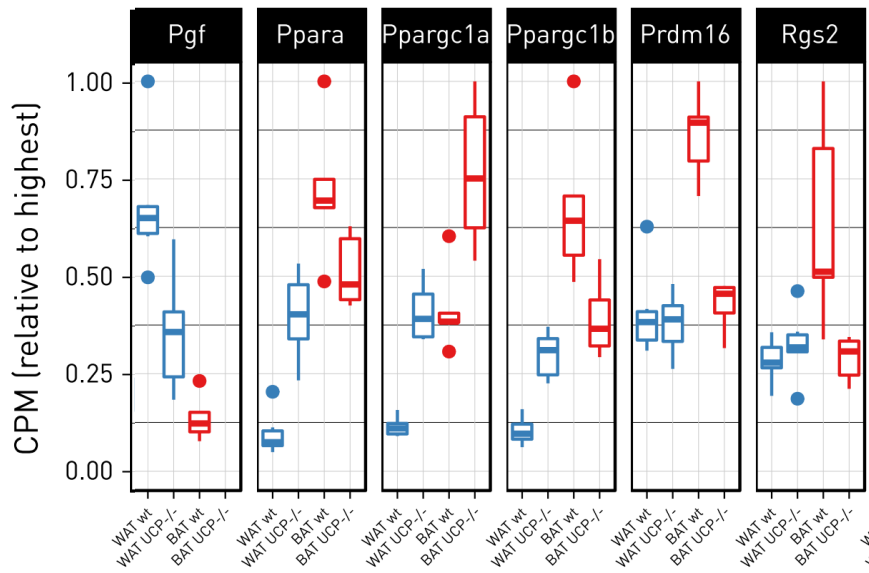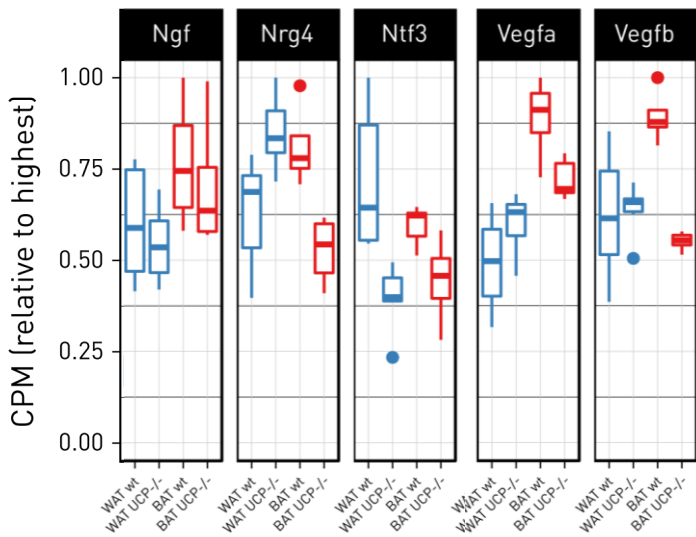**e**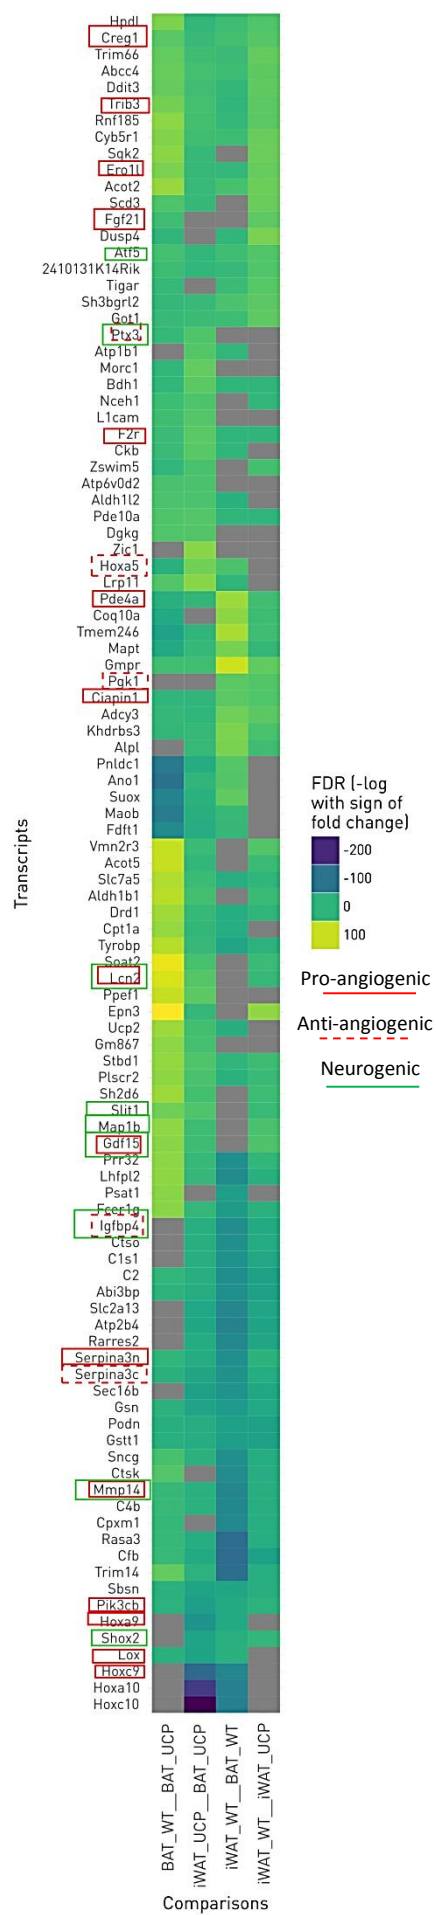

**Supplementary Figure 11: Transcriptomic analysis of *ucp-1* <sup>-/-</sup> mice long term exposed to cold: Thermogenic and neuro-vascular gene expression profile. n=5-6**

a: PCA of all genes demonstrating the distinct profile of *ucp-1* <sup>+/+</sup> vs <sup>-/-</sup> and BAT vs ScW.

b, c: Volcano plot showing the distribution of genes (with high logFDR and high logFC) significantly (red) or not (grey) regulated in the BAT (b) and ScW (c) from *ucp-1* <sup>-/-</sup> mice compared to <sup>+/+</sup> mice. *Bmp8b*, *nrg4*, and *vegfa/b* are presented in yellow.

d: Box plots showing the transcript levels of thermogenic, neurogenic and angiogenic related genes.

e: The top 30 up- and downregulated unique transcripts between *ucp-1* <sup>+/+</sup> and <sup>-/-</sup> mice were determined. The heatmap illustrates relative expression of the genotypes in BAT and ScW. Genes involved in angiogenesis and neurogenesis are boxed in red and green respectively.

## Supplementary Figure 12:

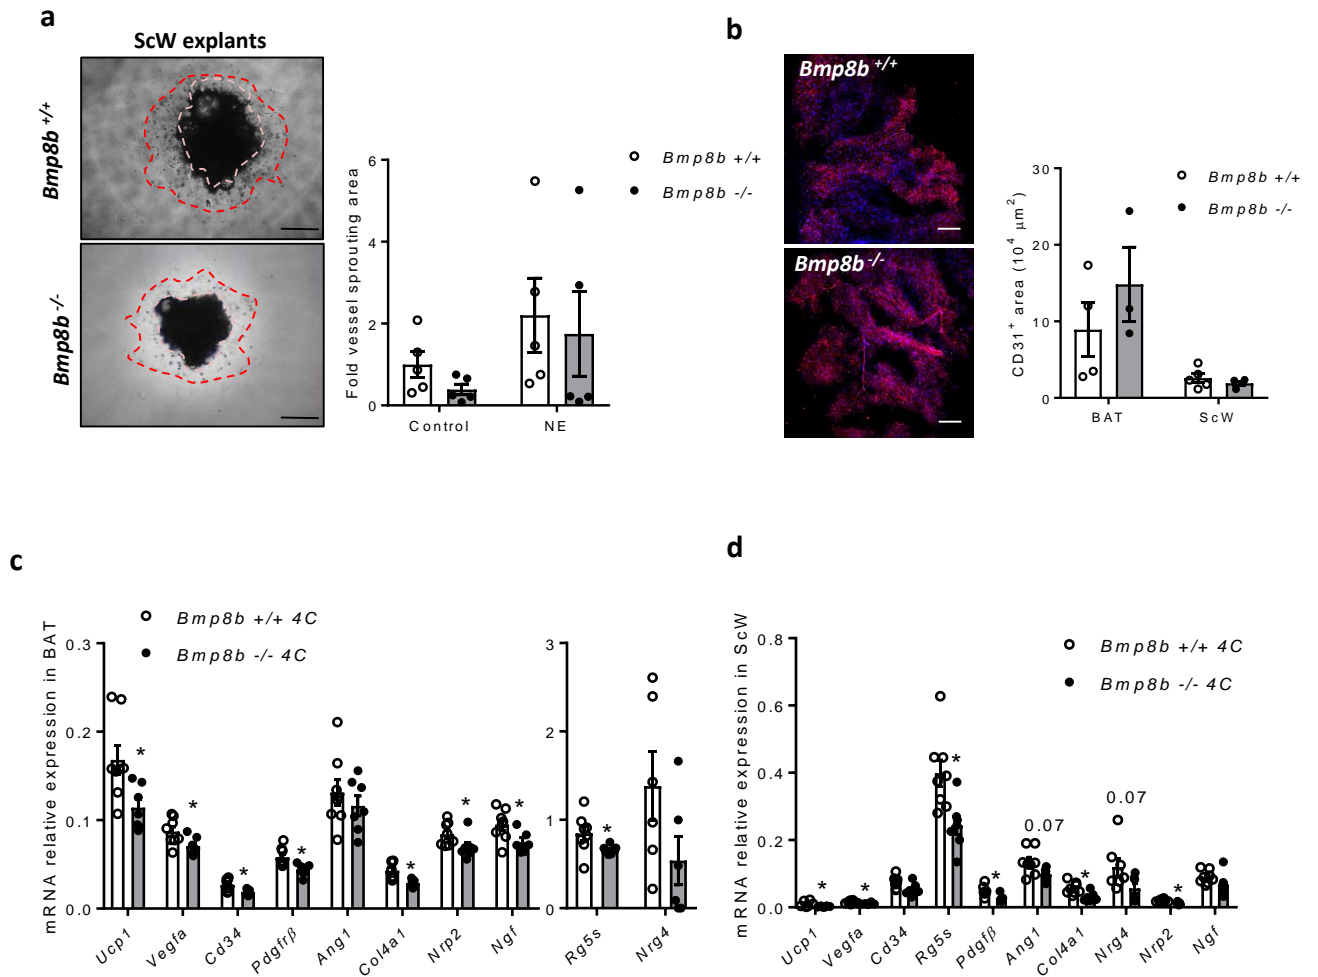

### Supplementary Figure 12: Vascularization in *bmp8b*<sup>-/-</sup> mice

a: 10 weeks old WT and *Bmp8b*<sup>-/-</sup> mice ScW explants were cultured on Matrigel without (Control) or with NE-stimulation (10<sup>-7</sup> M) for 10 days. Representative images of the cell sprouting in control conditions. Dotted white lines encompass the explant, dotted red lines show the cell sprouting area. Quantification of cell sprouting area, n = 5. Data is represented normalized to the WT control value. Scale bar, 500μm.

b: Representative images of confocal analysis of vascular features of inguinal ScW from 10-week-old WT and *Bmp8b*<sup>-/-</sup> (KO) mice : Vascular density ( immunostaining for CD31 in red and quantification). n=3-5. Scale bar, 100μm.

c, d: Fold variation of mRNA levels of molecules that regulate neurogenesis and angiogenesis in BAT (c) and ScW (d) from 12-week-old *Bmp8b*<sup>+/+</sup> and *Bmp8b*<sup>-/-</sup> mice. n = 7-8. \* p< 0.05 compared to WT using student's t-test.

## Supplementary Table 1: Key Resources

| REAGENT or RESOURCE                                                                                           | SOURCE                                                    | IDENTIFIER                                                                   |
|---------------------------------------------------------------------------------------------------------------|-----------------------------------------------------------|------------------------------------------------------------------------------|
| <b>Antibodies</b>                                                                                             |                                                           |                                                                              |
| Rabbit polyclonal beta Actin (dilution 1/2000)                                                                | Abcam                                                     | ab8227                                                                       |
| Mouse monoclonal [6C5] to GAPDH (dilution 1/1000)                                                             | Abcam                                                     | ab8245                                                                       |
| Mouse monoclonal [LHM 2] to NG2 (dilution 1/1000)                                                             | Abcam                                                     | ab83508                                                                      |
| Sheep polyclonal anti-Tyrosine Hydroxylase Antibody (dilution 1/200)                                          | Chemicon Millipore                                        | AB1542                                                                       |
| Rabbit polyclonal anti-UCP1 antibody ((dilution 1/1000)                                                       | Abcam                                                     | ab10983                                                                      |
| <b>Chemicals and Recombinant Proteins</b>                                                                     |                                                           |                                                                              |
| Recombinant Human beta-NGF Protein                                                                            | R&D systems                                               | Mouse myeloma cell line, NS0-derived Ser122-Ala241                           |
| Caspase Inhibitor III                                                                                         | Calbiochem                                                | CAS 634911-80-1                                                              |
| (±)-Norepinephrine (+)-bitartrate salt                                                                        | Sigma                                                     | A0937-5G                                                                     |
| Recombinant human BMP8a* (Bone morphogenic protein 8a)                                                        | R&D systems                                               | 1073-BP-010; E. coli-derived Ala264-His402 & Val265-His402                   |
| Recombinant human BMP7 (Bone morphogenic protein 7)                                                           | R&D systems                                               | 354-BP-010; Chinese Hamster Ovary cell line, CHO-derived human BMP-7 protein |
| Matrigel® Growth factor reduced Basement membrane Matrix                                                      | Corning                                                   | #354230                                                                      |
| PuraMatrix® hydrogel                                                                                          | Corning Life Science                                      | #354250                                                                      |
| Recombinant human NRG4 (Neuregulin-4)                                                                         | Life Technologies                                         | 12183HNCE25                                                                  |
| ALK7 Inhibitor                                                                                                | Selleck Chemicals LLC                                     | SB431542                                                                     |
| <b>Critical Commercial Assays</b>                                                                             |                                                           |                                                                              |
| ELISA kit for murine NRG4                                                                                     | Catlag Medsystems                                         | SEC174Mu                                                                     |
| ELISA kit for murine VEGF-A                                                                                   | R&D systems                                               | DuoSet DY493-05                                                              |
| LDH-Cytotoxicity Calorimetric Assay Kit II                                                                    | BioVision                                                 | #K313                                                                        |
| <b>Experimental Models: Cell Lines</b>                                                                        |                                                           |                                                                              |
| Immortalized brown adipocyte (C57BAT) cell line                                                               | Laboratory of Johannes Klein<br>Supplementary reference 1 | N/A                                                                          |
| 3T3L1 Cells                                                                                                   | Zen-Bio                                                   | SPL1F                                                                        |
| Mouse cardiac endothelial cell line (MCECs)                                                                   | Cedarlane Laboratories                                    | CLU510                                                                       |
| <b>Experimental Models: Organisms/Strains</b>                                                                 |                                                           |                                                                              |
| C57Bl/6J mice                                                                                                 | Charles River                                             | JAX™ Strain                                                                  |
| Bmp8b <sup>-/-</sup> on a C57Bl6/J                                                                            | Supplementary reference 2                                 | N/A                                                                          |
| Bmp8b TG mice, WT SV129* C57Bl/6J mixed strain mice and backcrossed until whole genome >98% C57Bl/6J genotype | In this paper                                             | N/A                                                                          |
| <b>Software and Algorithms</b>                                                                                |                                                           |                                                                              |
| Zeiss LSM 510 Meta Confocal microscope with LSM 3D software                                                   | Carl Zeiss                                                | N/A                                                                          |
| Fiji software                                                                                                 | ImageJ                                                    | N/A                                                                          |
| Image Lab™ software                                                                                           | Bio-Rad                                                   | N/A                                                                          |
| FACS Diva software                                                                                            | BD Biosciences                                            | N/A                                                                          |
| Prism 6                                                                                                       | GraphPad                                                  | N/A                                                                          |
| `piano` R package                                                                                             | Supplementary reference 3                                 | N/A                                                                          |
| pypath Python module that accompanies Omnipath                                                                | Supplementary reference 4                                 | N/A                                                                          |
| <b>Databases used for the phosphoproteomics analysis</b>                                                      |                                                           |                                                                              |
| PhosphoSitePlus                                                                                               | Supplementary reference 5                                 | N/A                                                                          |
| dbPTM                                                                                                         | Supplementary reference 5                                 | N/A                                                                          |
| HPRD                                                                                                          | Supplementary reference 6                                 | N/A                                                                          |
| Li 2012                                                                                                       | Supplementary reference 7                                 | N/A                                                                          |
| MIMP                                                                                                          | Supplementary reference 8                                 | N/A                                                                          |
| phospho.ELM                                                                                                   | Supplementary reference 9                                 | N/A                                                                          |
| PhosphoNetworks                                                                                               | Supplementary reference 10                                | N/A                                                                          |
| PhosphoSitePlus and Signor                                                                                    | Supplementary reference 11                                | N/A                                                                          |
| TF Regulons database                                                                                          | Supplementary reference 12                                | N/A                                                                          |

\*Recombinant human Bmp8a was used for Bmp8b treatment experiments on brown adipocytes, as in <sup>17</sup>. There is high protein sequence similarity between human Bmp8a, human Bmp8b, and murine Bmp8b, and previously the product was named human Bmp8b.

## Supplementary Table 2-Primer sequences

| Gene                        | Forward primer (5'-3')               | Reverse primer (5'-3')                | Probe (5'-3')                         | Reporter/quencher |
|-----------------------------|--------------------------------------|---------------------------------------|---------------------------------------|-------------------|
| <b>18s</b>                  | CGG CTA CCA CAT CCA AGG AA           | GCT GGA ATT ACC GCG GCT               | GAG GGC AAG TCT GGT GCC AG            | FAM/TAMRA         |
| <b>36b4</b>                 | AGA TGC AGC AGA TCC GCA T            | GTT CTT GCC CAT CAG CAC C             |                                       | SYBR              |
| <b>A1ar</b>                 | AGA GAA AGC CGC CAA G                | GGC TGG AGC ATG GGT ATA TG            |                                       | SYBR              |
| <b>A2ar</b>                 | CGC AGG CCA TCG AGT ACA A            | GGT GAC AAT GAT GGC CTT GAT           |                                       | SYBR              |
| <b>B3ar</b>                 | CCA GCC AGC CCT GTT GA               | GGA CGC GCA CCT TCA TAG C             |                                       | SYBR              |
| <b>Bactin</b>               | GCT CTG GCT CCT AGC ACC AT           | GCC ACC GAT CCA CAC AGA GT            | ATC AAG ATC ATT GCT CCT GAG CGC       | FAM/TAMRA         |
| <b>Acadl</b>                | GCA TGA AAC CAA ACG TCT GGA          | TGT TTT GTA ATT CAG ATG CCC AGT       | TCC GGT TCT GCT TCC ATG GCA AAA       | FAM/TAMRA         |
| <b>Angpt1</b>               | TTT CTC TTC CCA GAA ACT TCA GC       | GGC CAT CTC CGA CTT CAT ATT T         |                                       | SYBR              |
| <b>Angpt2</b>               | CAG CAC AAA CTC GGA AAC TGA<br>CT    | AGC TTG TTT ATT TCA CTG GTC TGA<br>TC |                                       | SYBR              |
| <b>B2m</b>                  | ACT GAT ACA TAC GCC TGC AGA<br>GTT   | TCA CAT GTC TCG ATC CCA GTA GA        |                                       | SYBR              |
| <b>Bdnf</b>                 | GGG TCA CAG CGG CAG ATA AA           | GCC TTT GGA TAC CGG GAC TT            |                                       | SYBR              |
| <b>Bmp2</b>                 | AAC ACC GTG CGC AGC TT               | GCC GTT TTC CCA CTC ATC TC            |                                       | SYBR              |
| <b>Bmp4</b>                 | GCC ATT CCG TAG TGC CAT T            | TTG CTG GAA AGG CTC AGA GA            |                                       | SYBR              |
| <b>Bmp5</b>                 | CAA GAA GCA CGA ACT CTA TGT<br>GAG T | CCC TTC TGG TGC TAT GAT CCA           |                                       | SYBR              |
| <b>Bmp6</b>                 | CGC AGG ACA GCG CTT TC               | GTC GTA CTC CAC CAG GTT CAC A         |                                       | SYBR              |
| <b>Bmp7</b>                 | TGG ATG GGC AGA GCA TCA A            | GGT CCA TGC CGT CCA ATC               |                                       | SYBR              |
| <b>Bmp8b<br/>endogenous</b> | TCC ACC AAC CAC GCC ACT AT           | CAG TAG GCA CAC AGC ACA CCT           | CAG GCC CTG GTA CAT CTG ATG AAG<br>CC | FAM/TAMRA         |
| <b>Bmp8b total</b>          | TCC ACC AAC CAC GCC ACT AT           | CAG TAG GCA CAC AGC ACA CCT           |                                       | SYBR              |
| <b>Bmp8b<br/>transgenic</b> | TCC ACC AAC CAC GCC ACT AT           | CAG TAG GCA CAC AGC ACA CCT           | AGG CCC TGG TGC ACT TAA TGA           | FAM/TAMRA         |
| <b>Bmp8a</b>                | AAC CAT GCC ATC TTG CAG TCT          | CAG AGG TGG CAC TCA GTT TGG           | TGT CCC CAA GGC ATG CTG TGC A         | FAM/TAMRA         |
| <b>Cd34</b>                 | CCC ACC GAG CCA TAT GCT T            | ACC TCC TCA CAA CTA GAT GCT TCA CTT   |                                       | SYBR              |
| <b>Cdh5</b>                 | CTT CAA GCT GCC AGA AAA CC           | GAA TTG GCC TCT GTC ACT GG            |                                       | SYBR              |
| <b>Cpt1b</b>                | GCG TGC CAG CCA CAA TTC              | TCC ATG CGG TAA TAT GCT TCA T         |                                       | SYBR              |
| <b>Cspg4</b>                | AGC AAG GAA GTG CAG AGG AG           | CAT CGA AAG ACA CCA TCA CG            |                                       | SYBR              |
| <b>Cxcl10</b>               | CGT CAT TTT CTG CCT CAT CC           | CGT GGC AAT GAT CTC AAC AC            |                                       | SYBR              |
| <b>Cxcl12</b>               | TGC ATC AGT GAC GGT AAA CCA          | TTC AGC CGT GCA ACA ATC               |                                       | SYBR              |
| <b>Dio2</b>                 | TGC GCT GTG TCT GGA ACA G            | CTG GAA TTG GGA GCA TCT TCA           |                                       | SYBR              |
| <b>Elov13</b>               | AAG GTT GAA CTG GGA CGA C            | GTG GTA CCA GTG GAC AAA               |                                       | SYBR              |
| <b>F3</b>                   | ACA ATT TTG GAG TGG CAA CC           | TGG GAC AGA GAG GAC CTT TG            |                                       | SYBR              |

|                 |                                                   |                                    |                                            |             |
|-----------------|---------------------------------------------------|------------------------------------|--------------------------------------------|-------------|
| <b>Fgf1</b>     | <b>AGG GGA GAT CAC AAC CTT CG</b>                 | <b>CAC TTT CCG CAC TGA GCT G</b>   |                                            | <b>SYBR</b> |
| <b>Fgf2</b>     | ABI TaqMan Gene Expression Assay ID Mm00433287_m1 |                                    |                                            | FAM/TAMRA   |
| <b>Flk1</b>     | GAT GCA GGA AAC TAC ACG GTC<br>AT                 | AGG AAT CCA TAG GCG AGA TCA A      |                                            | SYBR        |
| <b>Flk1</b>     | GAT GCA GGA AAC TAC ACG GTC<br>AT                 | AGG AAT CCA TAG GCG AGA TCA A      |                                            | SYBR        |
| <b>Foxc2</b>    | ABI TaqMan Gene Expression Assay ID Mm00546194_s1 |                                    |                                            | FAM/TAMRA   |
| <b>Hgf</b>      | ATG TGG GGG ACC AAA CTT C                         | TCA GTA ATG GGT CTT CCT TGG        |                                            | SYBR        |
| <b>Igf1</b>     | GAC CGA GGG GCT TTT ACT TC                        | GTC TTG GGC ATG TCA GTG TG         |                                            | SYBR        |
| <b>Igf2</b>     | TCT CAT CTC TTT GGC CTT CG                        | GCA CTC TTC CAC GAT G              |                                            | SYBR        |
| <b>Mcsm</b>     | GTG CGT CTT GTT CGC TG                            | TGC CTC TCC TTG TGA ATC AAA<br>AAC |                                            | SYBR        |
| <b>Ngf</b>      | AGT GTC TGG GCC CAA TAA AG                        | GTC TCC TTC TGG GAC ATT GC         |                                            | FAM/TAMRA   |
| <b>Nrg4</b>     | ABI TaqMan Gene Expression Assay ID Mm00446254_m1 |                                    |                                            | FAM/TAMRA   |
| <b>Pdgfa</b>    | CAC CAG CGT CAA G                                 | GAT GGT CTG GGT TCA GGT TG         |                                            | SYBR        |
| <b>Pdgfb</b>    | CCT TCC TCT CTG CTA CC                            | GTG TGC TCG GGT CAT GTT C          |                                            | SYBR        |
| <b>Pdgfc</b>    | AGT TGA GGA GCC CAG TGA TG                        | CGA AGG ACT CGT GGT TTC TG         |                                            | SYBR        |
| <b>Pdgfra</b>   | AGC TGT CAA CTT GCA CGA AG                        | CCG GAT CAG CTT TAA TTT GC         |                                            | SYBR        |
| <b>Pdgfrb</b>   | CAT GTC TGA GAC CCG GTA CG                        | CTG CAG GTA GAC CAG GTG AC         |                                            | SYBR        |
| <b>Pecam1</b>   | TCA GTC GGC AGA CAA GAT GCT                       | CCA TAT GGA TGC TGT TGA TGG T      |                                            | SYBR        |
| <b>Pgc1α</b>    | AAC CAC ACC CAC AGG ATC AGA                       | CTC TTC GCT TTA TTG CTC CAT GA     | CAA ACC CTG CCA TTG TTA AGA CCG AGA<br>A   | FAM/TAMRA   |
| <b>Pgf</b>      | TGT GTG CCG ATA AAG ACA GC                        | CCC TTG GTT TTC CTC CTT TC         |                                            | SYBR        |
| <b>Ppara</b>    | GAT TCA GAA GAA GAA CCG GAA<br>CA                 | GCG AAT TGC ATT GTG TGA CAT        | TGC CGT TTT CAC AAG TGC CTG TCT GTC        | FAM/TAMRA   |
| <b>Pparγ2</b>   | GAT GCA CTG CCT ATG AGC ACT T                     | AGA GGT CCA CAG AGC TGA TTC C      | AGA GAT GCC ATT CTG GCC CCA CCA ACT<br>T   | FAM/TAMRA   |
| <b>Prdm16</b>   | CAG CAC GGT GAA GCC ATT                           | GCG TGC ATC CGC TTG TG             |                                            | SYBR        |
| <b>Rgs2</b>     | GGA GAA AAT GAA GCG GAC AC                        | TTA CTG GCC AGC AGT TCA TC         |                                            | SYBR        |
| <b>Rgs5</b>     | AGA GGC CCC TAA AGA GGT GA                        | AGT CAA AGC TGC GAG GAG AC         |                                            | SYBR        |
| <b>Sema3a</b>   | GCT TTC CAT CCA ATC TGC AC                        | AGT CCC GTC CCA TGA AGT C          |                                            | SYBR        |
| <b>Sema3c</b>   | GAG CAA AGA CCA CAT CCT GTC                       | GCT CCA CTC CCA CAG ACA TAC        |                                            | SYBR        |
| <b>Tek</b>      | CTT CCA CAT TCC CCA GCC TC                        | ACT GCA CAG CTG GTT CTT CT         |                                            | SYBR        |
| <b>Th</b>       | GAG AGC TTC AGT GAT GCC AAG                       | CAT CCT GGA CCC CCT CTA AG         |                                            | SYBR        |
| <b>Thbs1</b>    | GAT GGG GTT GGA GAT CAG TG                        | TTG GCA TTA GGC ACA TAG GG         |                                            | SYBR        |
| <b>Ucp1</b>     | CCC GCT GGA CAC TGC C                             | ACC TAA TGG TAC TGG AAG CCT GG     | AAG TCC GCC TTC AGA TCC AAG GTG AAG        | FAM/TAMRA   |
| <b>Vegfa120</b> | GCC AGC ACA TAG AGA GAA TGA<br>GC                 | CGG CTT GTC ACA TTT TTC TGG        | ACA GCA GAT GTG AAT GCA GAC CAA<br>AGA AAG | FAM/TAMRA   |
| <b>Vegfa164</b> | GCC AGC ACA TAG AGA GAA TGA<br>GC                 | CAA GGC TCA CAG TGA TTT TCT GG     | ACA GCA GAT GTG AAT GCA GAC CAA<br>AGA AAG | FAM/TAMRA   |
| <b>Vegfa188</b> | GCC AGC ACA TAG AGA GAA TGA<br>GC                 | AAC AAG GCT CAC AGT GAA CGC T      | ACA GCA GAT GTG AAT GCA GAC CAA<br>AGA AAG | FAM/TAMRA   |
| <b>Vegfb</b>    | CAC CCA GGC CCC TGT GT                            | CCC ATG AGT TCC ATG CTC AGA        |                                            | SYBR        |



## Supplementary References

1. Klein, S. *et al.* Alpha 5 beta 1 integrin activates an NF-kappa B-dependent program of gene expression important for angiogenesis and inflammation. *Mol. Cell. Biol.* **22**, 5912–5922 (2002).
2. Zhao, G. Q., Deng, K., Labosky, P. A., Liaw, L. & Hogan, B. L. The gene encoding bone morphogenetic protein 8B is required for the initiation and maintenance of spermatogenesis in the mouse. *Genes Dev.* **10**, 1657–1669 (1996).
3. nVäremo, L., Nielsen, J. & Nookaew, I. Enriching the gene set analysis of genome-wide data by incorporating directionality of gene expression and combining statistical hypotheses and methods. *Nucleic Acids Res.* **41**, 4378–4391 (2013).
4. Türei, D., Korcsmáros, T. & Saez-Rodriguez, J. OmniPath: guidelines and gateway for literature-curated signaling pathway resources. *Nat. Methods* **13**, 966–967 (2016).
5. Hornbeck, P. V. *et al.* PhosphoSitePlus, 2014: mutations, PTMs and recalibrations. *Nucleic Acids Res.* **43**, D512-520 (2015).
6. Keshava Prasad, T. S. *et al.* Human Protein Reference Database--2009 update. *Nucleic Acids Res.* **37**, D767-772 (2009).
7. Li, L. *et al.* The human phosphotyrosine signaling network: evolution and hotspots of hijacking in cancer. *Genome Res.* **22**, 1222–1230 (2012).
8. Wagih, O., Reimand, J. & Bader, G. D. MIMP: predicting the impact of mutations on kinase-substrate phosphorylation. *Nat. Methods* **12**, 531–533 (2015).
9. Dinkel, H. *et al.* Phospho.ELM: a database of phosphorylation sites--update 2011. *Nucleic Acids Res.* **39**, D261-267 (2011).
10. Hu, J. *et al.* PhosphoNetworks: a database for human phosphorylation networks. *Bioinformatics* **30**, 141–142 (2014).
11. Perfetto, L. *et al.* SIGNOR: a database of causal relationships between biological entities. *Nucleic Acids Res.* **44**, D548-554 (2016).
12. Garcia-Alonso, L. *et al.* Transcription Factor Activities Enhance Markers of Drug Sensitivity in Cancer. *Cancer Res.* **78**, 769–780 (2018).
13. Subramanian, A. *et al.* Gene set enrichment analysis: a knowledge-based approach for interpreting genome-wide expression profiles. *Proc. Natl. Acad. Sci. U.S.A.* **102**, 15545–15550 (2005).
