# Supplementary material for: Adipocyte-secreted BMP8b mediates adrenergic-induced remodeling of the neuro-vascular network in adipose tissue
Source: PubMed Central journal article supplement (PMC6255810; doi:10.1038/s41467-018-07453-x), 2018-11-26
Supplement: 41467_2018_7453_MOESM5_ESM.pdf [file 41467_2018_7453_MOESM5_ESM.pdf]

## Geneset ranks (upregulated)

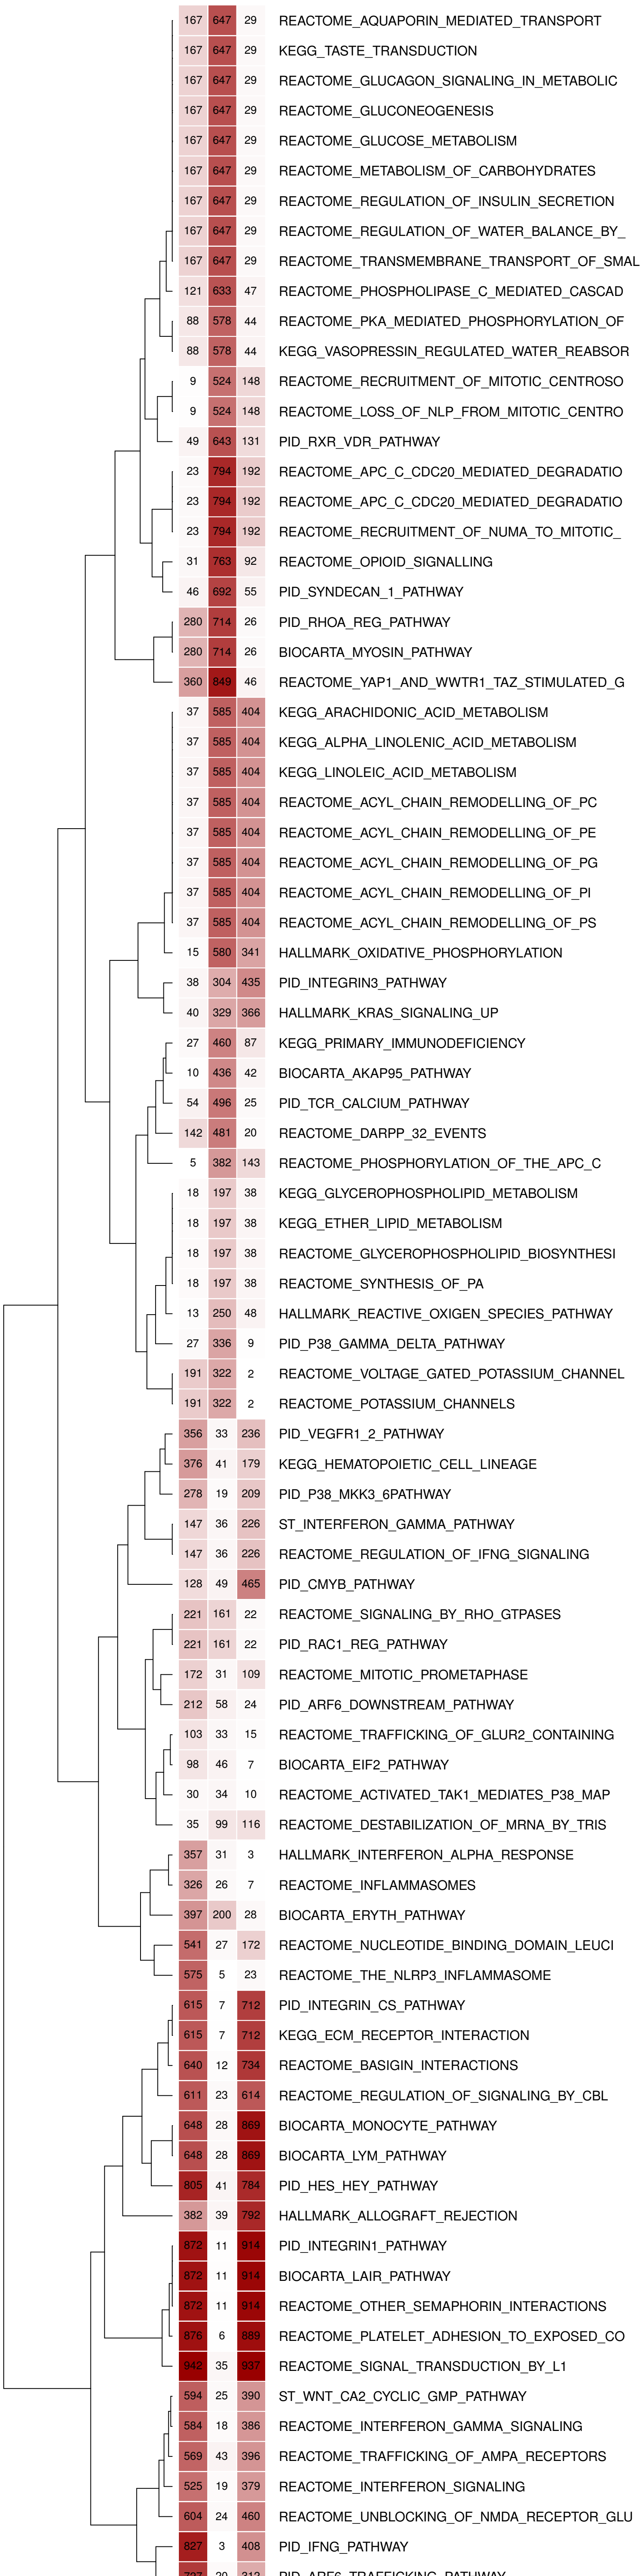

Genesets

Treatments
